# Supplementary material for: Fenugreek extract improves diabetes-induced endothelial dysfunctionviathe arginase 1 pathway
Source: Royal Society of Chemistry journal article supplement (doi:10.1039/d3fo04283a), 2024-01-01
Supplement: d3fo04283a1.pdf [file d3fo04283a1.pdf]

**Fig .3A raw data**

| 0 week-fasting blood glucose (mM) |            |             |             |             | 1 week-fasting blood glucose (mM) |            |             |             |             |
|-----------------------------------|------------|-------------|-------------|-------------|-----------------------------------|------------|-------------|-------------|-------------|
|                                   | NG         | DG          | LF-DG       | HF-DG       |                                   | NG         | DG          | LF-DG       | HF-DG       |
|                                   | 3.5        | 21.4        | 21.6        | 21.3        |                                   | 4.3        | 28.5        | 19.4        | 18.5        |
|                                   | 3.8        | 21.6        | 20.4        | 20.5        |                                   | 3.4        | 20.9        | 18.8        | 26.2        |
|                                   | 3.6        | 18.2        | 19.3        | 18.2        |                                   | 4.7        | 23.9        | 16.3        | 21.6        |
|                                   | 3.8        | 18.0        | 18.4        | 18.8        |                                   | 4.5        | 17.4        | 26.8        | 20.8        |
|                                   | 3.9        | 18.1        | 18.1        | 18.9        |                                   | 4.0        | 17.5        | 22.2        | 21.8        |
|                                   | 4.8        | 17.4        | 18.0        | 17.0        |                                   | 5.2        | 20.1        | 21.3        | 16.1        |
|                                   | 4.5        | 17.8        | 17.6        | 17.8        |                                   | 4.4        | 23.3        | 21.4        | 24.2        |
|                                   | 5.0        | 17.3        | 17.2        | 17.9        |                                   | 5.9        | 30.5        | 23.3        | 21.7        |
|                                   | 5.1        | 23.9        | 23.1        | 23.9        |                                   | 4.2        | 19.0        | 20.2        | 21.8        |
|                                   | 5.3        | 23.9        | 24.1        | 23.4        |                                   | 5.1        | 22.9        | 22.9        | 27.2        |
|                                   |            | 16.8        | 16.7        | 16.9        |                                   |            | 22.6        | 21.1        | 18.7        |
|                                   |            | 16.9        | 16.9        | 16.8        |                                   |            | 25.1        | 27.9        | 20.5        |
| <b>Mean</b>                       | <b>4.3</b> | <b>19.3</b> | <b>19.3</b> | <b>19.3</b> | <b>Mean</b>                       | <b>4.6</b> | <b>22.6</b> | <b>21.8</b> | <b>21.6</b> |

  

| 2 weeks-fasting blood glucose (mM) |            |             |             |             | 3 weeks-fasting blood glucose (mM) |            |             |             |             |
|------------------------------------|------------|-------------|-------------|-------------|------------------------------------|------------|-------------|-------------|-------------|
|                                    | NG         | DG          | LF-DG       | HF-DG       |                                    | NG         | DG          | LF-DG       | HF-DG       |
|                                    | 3.4        | 20.5        | 19.1        | 17.9        |                                    | 5.3        | 21.3        | 20.5        | 18.1        |
|                                    | 4.7        | 20.2        | 15.0        | 19.1        |                                    | 3.2        | 23.3        | 19.5        | 22.7        |
|                                    | 2.8        | 26.6        | 19.7        | 19.0        |                                    | 4.8        | 25.2        | 21.8        | 17.6        |
|                                    | 3.2        | 25.6        | 17.1        | 16.8        |                                    | 3.9        | 29.5        | 21.7        | 20.8        |
|                                    | 4.0        | 20.8        | 17.8        | 20.7        |                                    | 4.2        | 21.7        | 20.0        | 19.1        |
|                                    | 4.3        | 21.5        | 20.5        | 18.5        |                                    | 2.8        | 23.3        | 14.4        | 18.4        |
|                                    | 4.2        | 16.9        | 21.8        | 19.7        |                                    | 3.1        | 19.3        | 13.3        | 19.8        |
|                                    | 4.7        | 24.2        | 22.0        | 15.8        |                                    | 3.9        | 19.1        | 19.1        | 19.8        |
|                                    | 3.2        | 18.2        | 21.3        | 19.4        |                                    | 3.3        | 17.5        | 18.3        | 14.9        |
|                                    | 5.6        | 21.7        | 18.0        | 22.5        |                                    | 3.2        | 21.2        | 22.2        | 21.7        |
|                                    |            | 24.2        | 19.2        | 18.8        |                                    |            | 27.1        | 17.1        | 18.9        |
|                                    |            | 20.2        | 22.0        | 22.5        |                                    |            | 21.5        | 18.6        | 13.6        |
| <b>Mean</b>                        | <b>4.0</b> | <b>21.7</b> | <b>19.5</b> | <b>19.2</b> | <b>Mean</b>                        | <b>3.8</b> | <b>22.5</b> | <b>18.9</b> | <b>18.8</b> |

  

| 4 weeks-fasting blood glucose (mM) |            |             |             |             |
|------------------------------------|------------|-------------|-------------|-------------|
|                                    | NG         | DG          | LF-DG       | HF-DG       |
|                                    | 3.4        | 19.1        | 19.6        | 17.8        |
|                                    | 5.7        | 20.1        | 18.9        | 21.2        |
|                                    | 3.5        | 28.4        | 16.6        | 17.7        |
|                                    | 3.7        | 28.1        | 19.9        | 16.3        |
|                                    | 3.9        | 24.8        | 18.7        | 19.5        |
|                                    | 2.9        | 26.0        | 20.7        | 21.9        |
|                                    | 3.6        | 20.0        | 22.5        | 17.5        |
|                                    | 4.5        | 21.1        | 18.3        | 18.8        |
|                                    | 3.5        | 22.9        |             | 17.2        |
|                                    | 3.9        |             |             |             |
|                                    |            |             |             |             |
|                                    |            |             |             |             |
| <b>Mean</b>                        | <b>3.9</b> | <b>23.4</b> | <b>19.4</b> | <b>18.7</b> |

| Fig .3B raw data                |              |              |              |              |
|---------------------------------|--------------|--------------|--------------|--------------|
| Glycosylated hemoglobin (ng/mL) |              |              |              |              |
|                                 | NG           | DG           | LF-DG        | HF-DG        |
|                                 | 115.8        | 322.3        | 187.9        | 180.8        |
|                                 | 221.0        | 236.7        | 237.9        | 200.6        |
|                                 | 192.7        | 332.0        | 312.5        | 176.5        |
|                                 | 192.5        | 257.2        | 174.1        | 163.5        |
|                                 | 194.4        | 317.6        | 239.8        | 243.2        |
|                                 | 119.4        | 236.4        | 207.5        | 229.1        |
|                                 | 115.0        | 335.0        | 288.5        | 187.0        |
|                                 | 142.4        | 337.4        | 299.5        | 164.4        |
|                                 | 186.2        | 359.3        |              | 228.8        |
|                                 | 133.6        |              |              |              |
| <b>Mean</b>                     | <b>161.3</b> | <b>303.8</b> | <b>243.5</b> | <b>197.1</b> |

| Fig .3C raw data                             |             |             |             |             |                                              |             |             |             |             |
|----------------------------------------------|-------------|-------------|-------------|-------------|----------------------------------------------|-------------|-------------|-------------|-------------|
| 1 week-Average food intake of each mouse (g) |             |             |             |             | 2 week-Average food intake of each mouse (g) |             |             |             |             |
|                                              | NG          | DG          | LF-DG       | HF-DG       |                                              | NG          | DG          | LF-DG       | HF-DG       |
| First cage                                   | 24.7        | 41.8        | 40.8        | 43.2        | First cage                                   | 25.1        | 51.8        | 48.3        | 52.1        |
|                                              | 24.7        | 41.8        | 40.8        | 43.2        |                                              | 25.1        | 51.8        | 48.3        | 52.1        |
|                                              | 24.7        | 41.8        | 40.8        | 43.2        |                                              | 25.1        | 51.8        | 48.3        | 52.1        |
|                                              | 24.7        | 41.8        | 40.8        | 43.2        |                                              | 25.1        | 51.8        | 48.3        | 52.1        |
|                                              | 24.7        | 41.8        | 40.8        | 43.2        |                                              | 25.1        | 51.8        | 48.3        | 52.1        |
| Second cage                                  | 23.7        | 43.1        | 42.9        | 40.4        | Second cage                                  | 24.3        | 50.9        | 51.0        | 48.2        |
|                                              | 23.7        | 43.1        | 42.9        | 40.4        |                                              | 24.3        | 50.9        | 51.0        | 48.2        |
|                                              | 23.7        | 43.1        | 42.9        | 40.4        |                                              | 24.3        | 50.9        | 51.0        | 48.2        |
|                                              | 23.7        | 43.1        | 42.9        | 40.4        |                                              | 24.3        | 50.9        | 51.0        | 48.2        |
|                                              | 23.7        | 43.1        | 42.9        | 40.4        |                                              | 24.3        | 50.9        | 51.0        | 48.2        |
| <b>Mean</b>                                  | <b>24.2</b> | <b>42.5</b> | <b>41.9</b> | <b>41.8</b> | <b>Mean</b>                                  | <b>24.7</b> | <b>51.4</b> | <b>49.7</b> | <b>50.2</b> |
| 3 week-Average food intake of each mouse (g) |             |             |             |             | 4 week-Average food intake of each mouse (g) |             |             |             |             |
|                                              | NG          | DG          | LF-DG       | HF-DG       |                                              | NG          | DG          | LF-DG       | HF-DG       |
| First cage                                   | 23.9        | 47.6        | 46.9        | 49.6        | First cage                                   | 24.7        | 50.3        | 45.7        | 48.3        |
|                                              | 23.9        | 47.6        | 46.9        | 49.6        |                                              | 24.7        | 50.3        | 45.7        | 48.3        |
|                                              | 23.9        | 47.6        | 46.9        | 49.6        |                                              | 24.7        | 50.3        | 45.7        | 48.3        |
|                                              | 23.9        | 47.6        | 46.9        | 49.6        |                                              | 24.7        | 50.3        | 45.7        | 48.3        |
|                                              | 23.9        | 47.6        | 46.9        | 49.6        |                                              | 24.7        | 50.3        | 45.7        | 48.3        |
| Second cage                                  | 25.2        | 49.4        | 47.8        | 46.8        | Second cage                                  | 25.3        | 46.8        | 47.2        | 45.6        |
|                                              | 25.2        | 49.4        | 47.8        | 46.8        |                                              | 25.3        | 46.8        | 47.2        | 45.6        |
|                                              | 25.2        | 49.4        | 47.8        | 46.8        |                                              | 25.3        | 46.8        | 47.2        | 45.6        |
|                                              | 25.2        | 49.4        | 47.8        | 46.8        |                                              | 25.3        | 46.8        | 47.2        | 45.6        |
|                                              | 25.2        | 49.4        | 47.8        | 46.8        |                                              | 25.3        | 46.8        | 47.2        | 45.6        |
| <b>Mean</b>                                  | <b>24.5</b> | <b>48.5</b> | <b>47.4</b> | <b>48.2</b> | <b>Mean</b>                                  | <b>25.0</b> | <b>48.4</b> | <b>46.5</b> | <b>47.1</b> |

| <b>Fig .3D raw data</b>      |             |             |              |              |
|------------------------------|-------------|-------------|--------------|--------------|
| <b>Serum insulin (mIU/L)</b> |             |             |              |              |
|                              | <b>NG</b>   | <b>DG</b>   | <b>LF-DG</b> | <b>HF-DG</b> |
|                              | 27.6        | 20.0        | 22.9         | 31.6         |
|                              | 39.6        | 17.8        | 20.8         | 26.8         |
|                              | 31.1        | 14.3        | 27.1         | 20.2         |
|                              | 38.8        | 14.6        | 19.7         | 26.2         |
|                              | 36.1        | 15.1        | 27.8         | 27.4         |
|                              | 29.2        | 13.0        | 20.9         | 34.0         |
|                              | 39.4        | 13.7        | 26.7         | 35.4         |
|                              | 37.1        | 22.9        | 23.2         | 20.3         |
|                              | 29.9        | 19.3        |              | 30.4         |
|                              | 34.2        |             |              |              |
| <b>Mean</b>                  | <b>34.3</b> | <b>16.8</b> | <b>23.6</b>  | <b>28.0</b>  |

| <b>Fig .3E raw data</b>            |               |                |                |               |
|------------------------------------|---------------|----------------|----------------|---------------|
| <b>Average food efficiency (%)</b> |               |                |                |               |
|                                    | <b>NG</b>     | <b>DG</b>      | <b>LF-DG</b>   | <b>HF-DG</b>  |
| <b>First cage</b>                  | 4.1684        | 0.2219         | -1.2429        | 0.1380        |
|                                    | 4.1684        | 0.2219         | -1.2429        | 0.1380        |
|                                    | 4.1684        | 0.2219         | -1.2429        | 0.1380        |
|                                    | 4.1684        | 0.2219         | -1.2429        | 0.1380        |
|                                    | 4.1684        |                |                | 0.1380        |
| <b>Second cage</b>                 | 2.5401        | -0.2716        | 0.6838         | -0.0230       |
|                                    | 2.5401        | -0.2716        | 0.6838         | -0.0230       |
|                                    | 2.5401        | -0.2716        | 0.6838         | -0.0230       |
|                                    | 2.5401        | -0.2716        | 0.6838         | -0.0230       |
|                                    | 2.5401        | -0.2716        |                |               |
| <b>Mean</b>                        | <b>3.3542</b> | <b>-0.0523</b> | <b>-0.2796</b> | <b>0.0665</b> |

| <b>Average food intake of total 4 weeks (g/mouse)</b> |           |           |              |              |
|-------------------------------------------------------|-----------|-----------|--------------|--------------|
|                                                       | <b>NG</b> | <b>DG</b> | <b>LF-DG</b> | <b>HF-DG</b> |
| <b>First cage</b>                                     | 98.4      | 191.5     | 181.7        | 193.2        |
| <b>Second cage</b>                                    | 98.4      | 190.2     | 188.9        | 181.0        |
| <b>Mean</b>                                           | 98.4      | 190.9     | 185.3        | 187.1        |
| <b>STDEV</b>                                          | 0.0424    | 0.9192    | 5.0912       | 8.6503       |

| <b>Average weight gain of of total 4 weeks (g/mouse)</b> |           |           |              |              |
|----------------------------------------------------------|-----------|-----------|--------------|--------------|
|                                                          | <b>NG</b> | <b>DG</b> | <b>LF-DG</b> | <b>HF-DG</b> |
| <b>First cage</b>                                        | 4.1       | 0.4       | -2.3         | 0.3          |
| <b>Second cage</b>                                       | 2.5       | -0.5      | 1.3          | 0.0          |
| <b>Mean</b>                                              | 3.3       | 0.0       | -0.5         | 0.1          |
| <b>STDEV</b>                                             | 1.1314    | 0.6659    | 2.5102       | 0.2180       |

Fig .3F raw data

| 0 week-Fasting body weight (g) |      |      |       |       | 1 week-Fasting body weight (g) |      |      |       |       |
|--------------------------------|------|------|-------|-------|--------------------------------|------|------|-------|-------|
|                                | NG   | DG   | LF-DG | HF-DG |                                | NG   | DG   | LF-DG | HF-DG |
|                                | 20.4 | 16.5 | 18.2  | 16.9  |                                | 23.8 | 18.1 | 16.7  | 21.6  |
|                                | 22.8 | 15.7 | 18.0  | 17.2  |                                | 25.6 | 19.7 | 16.4  | 17.8  |
|                                | 21.4 | 19.7 | 17.4  | 17.3  |                                | 19.0 | 18.4 | 17.5  | 17.6  |
|                                | 22.8 | 16.3 | 17.2  | 17.6  |                                | 22.3 | 17.8 | 17.4  | 15.7  |
|                                | 20.6 | 14.6 | 16.3  | 16.3  |                                | 22.4 | 17.5 | 16.6  | 19.2  |
|                                | 21.2 | 18.6 | 16.6  | 15.7  |                                | 24.1 | 18.3 | 17.7  | 18.0  |
|                                | 21.8 | 15.3 | 17.6  | 16.7  |                                | 21.2 | 17.4 | 17.5  | 17.0  |
|                                | 22.3 | 15.5 | 14.8  | 16.9  |                                | 21.2 | 17.5 | 18.3  | 17.5  |
|                                | 20.7 | 16.0 | 18.2  | 16.1  |                                | 20.9 | 17.7 | 17.6  | 18.4  |
|                                | 20.7 | 19.5 | 16.7  | 19.7  |                                | 21.4 | 17.9 | 17.4  | 15.8  |
|                                |      | 16.8 | 17.3  | 14.6  |                                |      | 17.1 | 14.5  | 17.2  |
|                                |      | 17.8 | 15.2  | 15.7  |                                |      | 17.2 | 17.4  | 16.3  |
| Mean                           | 21.5 | 16.9 | 17.0  | 16.7  | Mean                           | 22.2 | 17.9 | 17.1  | 17.7  |

  

| 2 weeks-Fasting body weight (g) |      |      |       |       | 3 weeks-Fasting body weight (g) |      |      |       |       |
|---------------------------------|------|------|-------|-------|---------------------------------|------|------|-------|-------|
|                                 | NG   | DG   | LF-DG | HF-DG |                                 | NG   | DG   | LF-DG | HF-DG |
|                                 | 25.1 | 17.5 | 15.8  | 21.5  |                                 | 25.8 | 17.1 | 15.5  | 22.0  |
|                                 | 26.9 | 19.1 | 15.5  | 17.6  |                                 | 27.0 | 19.1 | 15.1  | 17.1  |
|                                 | 21.0 | 17.7 | 14.9  | 18.1  |                                 | 22.8 | 17.1 | 14.8  | 18.9  |
|                                 | 23.2 | 17.5 | 16.6  | 15.3  |                                 | 24.0 | 17.2 | 16.2  | 16.5  |
|                                 | 24.4 | 17.3 | 16.6  | 18.8  |                                 | 26.1 | 17.3 | 15.4  | 14.9  |
|                                 | 24.7 | 17.6 | 18.2  | 17.7  |                                 | 27.2 | 17.1 | 17.5  | 15.9  |
|                                 | 21.0 | 17.7 | 18.1  | 16.4  |                                 | 21.7 | 16.6 | 16.2  | 16.0  |
|                                 | 21.6 | 16.8 | 18.5  | 16.2  |                                 | 22.2 | 16.7 | 17.6  | 15.8  |
|                                 | 22.0 | 17.1 | 17.8  | 18.4  |                                 | 23.4 | 16.3 | 17.6  | 17.8  |
|                                 | 21.7 | 18.1 | 18.0  | 16.5  |                                 | 22.5 | 18.0 | 17.3  | 16.0  |
|                                 |      | 14.2 | 16.9  | 16.2  |                                 |      | 13.5 | 15.7  | 14.3  |
|                                 |      | 16.4 | 15.2  | 15.5  |                                 |      | 16.3 | 16.5  | 14.4  |
| Mean                            | 23.2 | 17.3 | 16.8  | 17.4  | Mean                            | 24.3 | 16.9 | 16.3  | 16.6  |

  

| 4 weeks-Fasting body weight (g) |      |      |       |       |
|---------------------------------|------|------|-------|-------|
|                                 | NG   | DG   | LF-DG | HF-DG |
|                                 | 26.3 | 16.8 | 15.2  | 19.6  |
|                                 | 27.1 | 18.7 | 14.7  | 16.3  |
|                                 | 24.0 | 16.3 | 15.6  | 16.8  |
|                                 | 24.4 | 17.5 | 14.6  | 15.0  |
|                                 | 26.7 | 17.1 | 18.2  | 17.8  |
|                                 | 27.1 | 16.9 | 17.7  | 16.5  |
|                                 | 22.2 | 16.1 | 18.3  | 16.3  |
|                                 | 22.8 | 15.8 | 17.5  | 15.8  |
|                                 | 24.6 | 15.6 |       | 17.7  |
|                                 | 22.5 |      |       |       |
|                                 |      |      |       |       |
| Mean                            | 24.8 | 16.8 | 16.5  | 16.9  |

**Fig .3G raw data**

**NG**

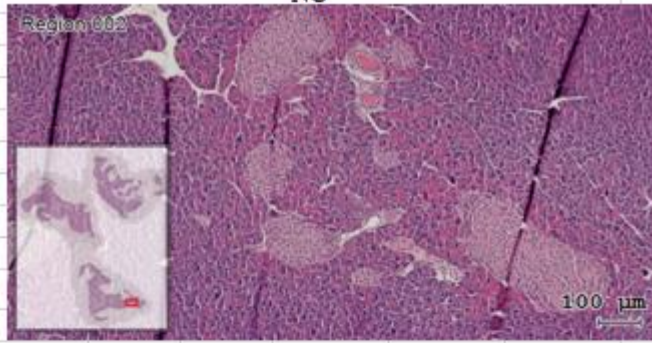

**DG**

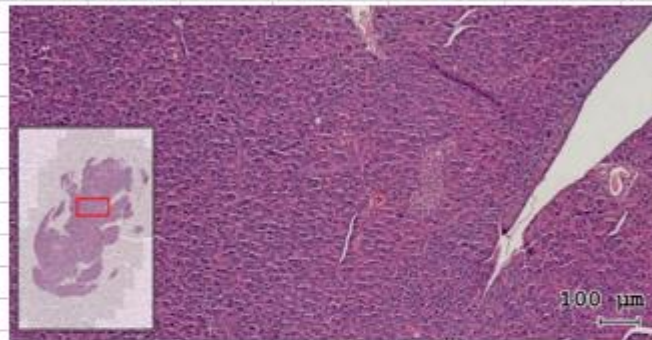

**LF-DG**

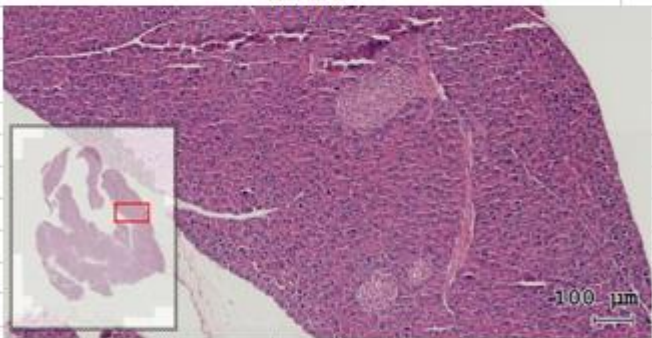

**HF-DG**

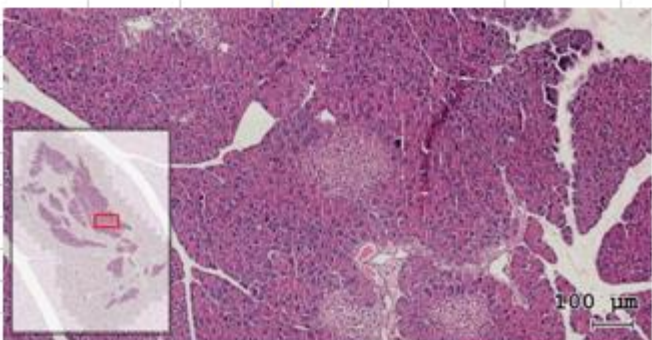

Fig .3H raw data

| Islet area( $\mu\text{m}^2$ )    |              |              |              |              |
|----------------------------------|--------------|--------------|--------------|--------------|
|                                  | NG           | DG           | LF-DG        | HF-DG        |
|                                  | 430996.77    | 115243.95    | 136424.32    | 165049.69    |
|                                  | 178766.23    | 15427.59     | 121241.32    | 128010.26    |
|                                  | 217394.77    | 66923.97     | 74097.59     | 482895.53    |
|                                  | 237489.95    | 90181.32     | 62008.73     | 269734.24    |
|                                  | 472506.88    | 71750.30     | 69996.89     | 169453.31    |
|                                  |              |              |              |              |
| Pancreas area( $\mu\text{m}^2$ ) |              |              |              |              |
|                                  | NG           | DG           | LF-DG        | HF-DG        |
|                                  | 21457781.25  | 19963817.79  | 24190580.60  | 15835743.07  |
|                                  | 21849969.00  | 9091135.46   | 19449271.64  | 21521841.79  |
|                                  | 27310298.33  | 15509508.13  | 25114813.97  | 31802186.26  |
|                                  | 21934843.75  | 29600169.48  | 16079588.41  | 22420587.14  |
|                                  | 29191336.14  | 12142852.06  | 13489877.05  | 27098779.30  |
|                                  |              |              |              |              |
| Islet area/Pancreas area(%)      |              |              |              |              |
|                                  | NG           | DG           | LF-DG        | HF-DG        |
|                                  | 2.01%        | 0.58%        | 0.56%        | 1.04%        |
|                                  | 0.82%        | 0.17%        | 0.62%        | 0.59%        |
|                                  | 0.80%        | 0.43%        | 0.30%        | 1.52%        |
|                                  | 1.08%        | 0.30%        | 0.39%        | 1.20%        |
|                                  | 1.62%        | 0.59%        | 0.52%        | 0.63%        |
|                                  |              |              |              |              |
| <b>Mean</b>                      | <b>1.26%</b> | <b>0.41%</b> | <b>0.48%</b> | <b>1.00%</b> |

**Fig .4A raw data**

| Aorta contract value(mN)   |       |       |        |       |       |       | Relaxation(%NE)            |        |        |        |        |        |        |        |
|----------------------------|-------|-------|--------|-------|-------|-------|----------------------------|--------|--------|--------|--------|--------|--------|--------|
|                            | NG-1  | NG-2  | NG-3   | NG-4  | NG-5  | NG-6  |                            | NG-1   | NG-2   | NG-3   | NG-4   | NG-5   | NG-6   | Mean   |
| ACh(0M)                    | 9.758 | 7.886 | 11.352 | 6.153 | 6.665 | 8.789 |                            |        |        |        |        |        |        |        |
| ACh( $1 \times 10^{-9}$ M) | 9.570 | 7.413 | 10.927 | 5.842 | 6.019 | 8.254 | ACh( $1 \times 10^{-9}$ M) | 1.93%  | 6.00%  | 3.74%  | 5.05%  | 9.69%  | 6.09%  | 5.42%  |
| ACh( $5 \times 10^{-9}$ M) | 9.375 | 7.138 | 10.022 | 5.309 | 5.816 | 8.002 | ACh( $5 \times 10^{-9}$ M) | 3.92%  | 9.49%  | 11.72% | 13.72% | 12.74% | 8.95%  | 10.09% |
| ACh( $1 \times 10^{-8}$ M) | 9.252 | 6.031 | 9.662  | 4.551 | 5.079 | 7.545 | ACh( $1 \times 10^{-8}$ M) | 5.19%  | 23.52% | 14.89% | 26.04% | 23.80% | 14.15% | 17.93% |
| ACh( $5 \times 10^{-8}$ M) | 7.626 | 5.501 | 9.109  | 4.018 | 4.225 | 7.079 | ACh( $5 \times 10^{-8}$ M) | 21.85% | 30.24% | 19.76% | 34.70% | 36.61% | 19.46% | 27.10% |
| ACh( $1 \times 10^{-7}$ M) | 6.047 | 4.025 | 6.849  | 3.588 | 3.105 | 5.132 | ACh( $1 \times 10^{-7}$ M) | 38.03% | 48.96% | 39.67% | 41.69% | 53.41% | 41.61% | 43.89% |
| ACh( $5 \times 10^{-7}$ M) | 3.262 | 3.175 | 4.613  | 2.788 | 2.205 | 2.239 | ACh( $5 \times 10^{-7}$ M) | 66.57% | 59.74% | 59.36% | 54.69% | 66.92% | 74.52% | 63.63% |
| ACh( $1 \times 10^{-6}$ M) | 2.061 | 1.423 | 3.322  | 1.337 | 1.908 | 1.911 | ACh( $1 \times 10^{-6}$ M) | 78.88% | 81.96% | 70.74% | 78.27% | 71.37% | 78.26% | 76.58% |
| ACh( $5 \times 10^{-6}$ M) | 1.125 | 1.003 | 3.047  | 0.917 | 1.638 | 1.722 | ACh( $5 \times 10^{-6}$ M) | 88.47% | 87.28% | 73.16% | 85.10% | 75.42% | 80.41% | 81.64% |
| ACh( $1 \times 10^{-5}$ M) | 1.025 | 0.805 | 2.734  | 0.781 | 1.489 | 1.587 | ACh( $1 \times 10^{-5}$ M) | 89.50% | 89.79% | 75.92% | 87.31% | 77.66% | 81.94% | 83.69% |

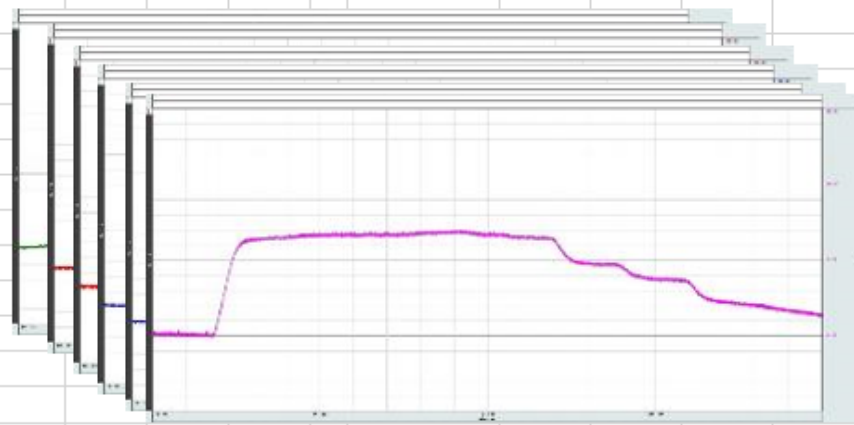

| Aorta contract value(mN)   |       |       |       |       |       |       | Relaxation(%NE)            |        |        |        |        |        |        |        |
|----------------------------|-------|-------|-------|-------|-------|-------|----------------------------|--------|--------|--------|--------|--------|--------|--------|
|                            | DG-1  | DG-2  | DG-3  | DG-4  | DG-5  | DG-6  |                            | DG-1   | DG-2   | DG-3   | DG-4   | DG-5   | DG-6   | Mean   |
| ACh(0M)                    | 8.398 | 6.391 | 5.908 | 9.131 | 4.126 | 7.642 |                            |        |        |        |        |        |        |        |
| ACh( $1 \times 10^{-9}$ M) | 8.154 | 6.187 | 5.807 | 9.007 | 4.082 | 7.500 | ACh( $1 \times 10^{-9}$ M) | 2.91%  | 3.19%  | 1.71%  | 1.36%  | 1.07%  | 1.86%  | 2.01%  |
| ACh( $5 \times 10^{-9}$ M) | 7.937 | 6.032 | 5.724 | 8.986 | 3.842 | 7.491 | ACh( $5 \times 10^{-9}$ M) | 5.49%  | 5.62%  | 3.11%  | 1.59%  | 6.88%  | 1.98%  | 4.11%  |
| ACh( $1 \times 10^{-8}$ M) | 7.005 | 5.769 | 5.657 | 8.331 | 3.293 | 7.192 | ACh( $1 \times 10^{-8}$ M) | 16.59% | 9.73%  | 4.25%  | 8.76%  | 20.19% | 5.89%  | 10.90% |
| ACh( $5 \times 10^{-8}$ M) | 6.214 | 4.527 | 4.292 | 7.332 | 2.700 | 6.351 | ACh( $5 \times 10^{-8}$ M) | 26.01% | 29.17% | 27.35% | 19.70% | 34.56% | 16.89% | 25.61% |
| ACh( $1 \times 10^{-7}$ M) | 5.101 | 3.296 | 3.663 | 5.101 | 2.332 | 5.661 | ACh( $1 \times 10^{-7}$ M) | 39.26% | 48.43% | 38.00% | 44.14% | 43.48% | 25.92% | 39.87% |
| ACh( $5 \times 10^{-7}$ M) | 4.322 | 2.716 | 3.102 | 4.235 | 2.002 | 5.117 | ACh( $5 \times 10^{-7}$ M) | 48.54% | 57.50% | 47.49% | 53.62% | 51.48% | 33.04% | 48.61% |
| ACh( $1 \times 10^{-6}$ M) | 3.253 | 2.473 | 2.917 | 4.019 | 1.653 | 4.003 | ACh( $1 \times 10^{-6}$ M) | 61.26% | 61.30% | 50.63% | 55.99% | 59.94% | 47.62% | 56.12% |
| ACh( $5 \times 10^{-6}$ M) | 2.944 | 2.526 | 2.400 | 3.885 | 1.323 | 3.601 | ACh( $5 \times 10^{-6}$ M) | 64.94% | 60.48% | 59.38% | 57.45% | 67.94% | 52.88% | 60.51% |
| ACh( $1 \times 10^{-5}$ M) | 2.807 | 2.479 | 2.271 | 3.711 | 1.270 | 3.564 | ACh( $1 \times 10^{-5}$ M) | 66.58% | 61.21% | 61.56% | 59.36% | 69.22% | 53.36% | 61.88% |

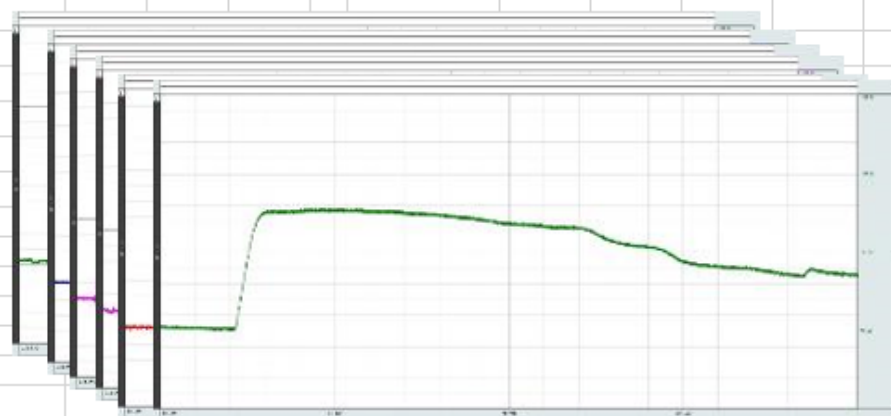

| Aorta contract value(mN)   |         |         |         |         |         |         | Relaxation(%NE)            |         |         |         |         |         |        |        |
|----------------------------|---------|---------|---------|---------|---------|---------|----------------------------|---------|---------|---------|---------|---------|--------|--------|
|                            | LF-DG-1 | LF-DG-2 | LF-DG-3 | LF-DG-4 | LF-DG-5 | LF-DG-6 |                            |         |         |         |         |         |        |        |
|                            |         |         |         |         |         |         | LF-DG-1                    | LF-DG-2 | LF-DG-3 | LF-DG-4 | LF-DG-5 | LF-DG-6 | Mean   |        |
| ACh(0M)                    | 6.382   | 10.327  | 8.747   | 9.792   | 8.689   | 6.152   |                            |         |         |         |         |         |        |        |
| ACh( $1 \times 10^{-9}$ M) | 6.322   | 9.539   | 8.461   | 9.260   | 8.382   | 6.008   | ACh( $1 \times 10^{-9}$ M) | 0.94%   | 7.63%   | 3.27%   | 5.43%   | 3.53%   | 2.34%  | 3.86%  |
| ACh( $5 \times 10^{-9}$ M) | 6.011   | 9.171   | 8.066   | 8.158   | 7.749   | 5.611   | ACh( $5 \times 10^{-9}$ M) | 5.81%   | 11.19%  | 7.79%   | 16.69%  | 10.82%  | 8.79%  | 10.18% |
| ACh( $1 \times 10^{-8}$ M) | 5.929   | 8.896   | 7.206   | 7.918   | 7.322   | 5.075   | ACh( $1 \times 10^{-8}$ M) | 7.10%   | 13.86%  | 17.62%  | 19.14%  | 15.73%  | 17.51% | 15.16% |
| ACh( $5 \times 10^{-8}$ M) | 5.688   | 7.482   | 7.085   | 6.383   | 5.834   | 4.551   | ACh( $5 \times 10^{-8}$ M) | 10.87%  | 27.55%  | 19.00%  | 34.81%  | 32.86%  | 26.02% | 25.19% |
| ACh( $1 \times 10^{-7}$ M) | 4.389   | 5.838   | 4.828   | 5.723   | 4.526   | 4.102   | ACh( $1 \times 10^{-7}$ M) | 31.23%  | 43.47%  | 44.80%  | 41.55%  | 47.91%  | 33.32% | 40.38% |
| ACh( $5 \times 10^{-7}$ M) | 3.191   | 3.069   | 2.514   | 4.374   | 3.434   | 3.114   | ACh( $5 \times 10^{-7}$ M) | 50.00%  | 70.28%  | 71.26%  | 55.33%  | 60.48%  | 49.38% | 59.46% |
| ACh( $1 \times 10^{-6}$ M) | 1.546   | 2.723   | 2.121   | 3.668   | 2.478   | 2.905   | ACh( $1 \times 10^{-6}$ M) | 75.78%  | 73.63%  | 75.75%  | 62.54%  | 71.48%  | 52.78% | 68.66% |
| ACh( $5 \times 10^{-6}$ M) | 1.099   | 2.156   | 1.834   | 3.335   | 2.119   | 2.603   | ACh( $5 \times 10^{-6}$ M) | 82.79%  | 79.12%  | 79.03%  | 65.94%  | 75.61%  | 57.69% | 73.36% |
| ACh( $1 \times 10^{-5}$ M) | 1.050   | 2.094   | 1.809   | 3.373   | 2.090   | 2.607   | ACh( $1 \times 10^{-5}$ M) | 83.55%  | 79.72%  | 79.32%  | 65.55%  | 75.95%  | 57.62% | 73.62% |

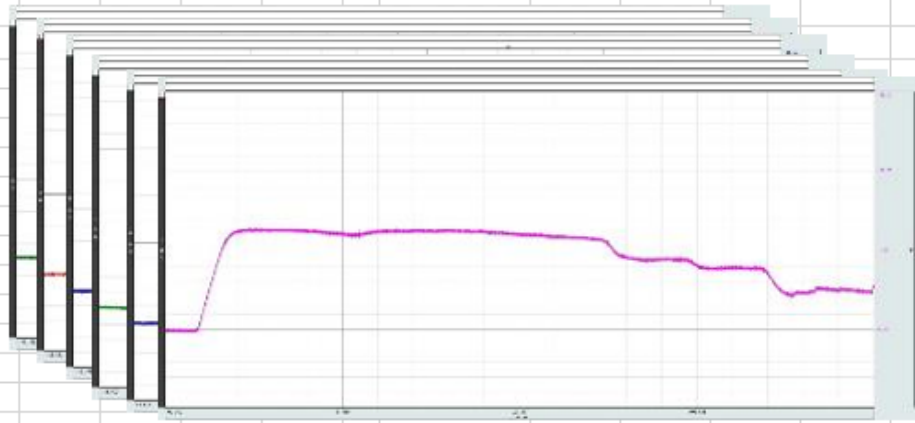

| Aorta contract value(mN)   |         |         |         |         |         |         | Relaxation(%NE)            |         |         |         |         |         |        |        |
|----------------------------|---------|---------|---------|---------|---------|---------|----------------------------|---------|---------|---------|---------|---------|--------|--------|
|                            | HF-DG-1 | HF-DG-2 | HF-DG-3 | HF-DG-4 | HF-DG-5 | HF-DG-6 |                            |         |         |         |         |         |        |        |
|                            |         |         |         |         |         |         | HF-DG-1                    | HF-DG-2 | HF-DG-3 | HF-DG-4 | HF-DG-5 | HF-DG-6 | Mean   |        |
| ACh(0M)                    | 10.158  | 8.007   | 12.925  | 9.546   | 11.383  | 10.671  |                            |         |         |         |         |         |        |        |
| ACh( $1 \times 10^{-9}$ M) | 9.135   | 7.142   | 12.319  | 9.305   | 10.992  | 10.138  | ACh( $1 \times 10^{-9}$ M) | 10.07%  | 10.80%  | 4.69%   | 2.52%   | 3.43%   | 4.99%  | 6.09%  |
| ACh( $5 \times 10^{-9}$ M) | 8.812   | 6.907   | 12.225  | 9.031   | 10.415  | 9.605   | ACh( $5 \times 10^{-9}$ M) | 13.25%  | 13.74%  | 5.42%   | 5.39%   | 8.50%   | 9.99%  | 9.38%  |
| ACh( $1 \times 10^{-8}$ M) | 7.795   | 6.937   | 11.935  | 8.917   | 9.585   | 9.037   | ACh( $1 \times 10^{-8}$ M) | 23.26%  | 13.36%  | 7.66%   | 6.59%   | 15.80%  | 15.31% | 13.66% |
| ACh( $5 \times 10^{-8}$ M) | 6.303   | 6.393   | 10.915  | 7.332   | 9.147   | 8.787   | ACh( $5 \times 10^{-8}$ M) | 37.95%  | 20.16%  | 15.55%  | 23.19%  | 19.64%  | 17.66% | 22.36% |
| ACh( $1 \times 10^{-7}$ M) | 4.036   | 4.001   | 8.003   | 5.371   | 5.839   | 5.771   | ACh( $1 \times 10^{-7}$ M) | 60.27%  | 50.03%  | 38.08%  | 43.74%  | 48.70%  | 45.92% | 47.79% |
| ACh( $5 \times 10^{-7}$ M) | 2.707   | 3.025   | 6.401   | 2.916   | 3.837   | 3.991   | ACh( $5 \times 10^{-7}$ M) | 73.35%  | 62.22%  | 50.48%  | 69.45%  | 66.29%  | 62.60% | 64.07% |
| ACh( $1 \times 10^{-6}$ M) | 2.428   | 2.347   | 5.015   | 2.409   | 3.013   | 3.137   | ACh( $1 \times 10^{-6}$ M) | 76.10%  | 70.69%  | 61.20%  | 74.76%  | 73.53%  | 70.60% | 71.15% |
| ACh( $5 \times 10^{-6}$ M) | 2.031   | 1.728   | 4.458   | 1.933   | 2.731   | 2.806   | ACh( $5 \times 10^{-6}$ M) | 80.01%  | 78.42%  | 65.51%  | 79.75%  | 76.01%  | 73.70% | 75.57% |
| ACh( $1 \times 10^{-5}$ M) | 1.952   | 1.714   | 4.126   | 1.636   | 2.441   | 2.295   | ACh( $1 \times 10^{-5}$ M) | 80.78%  | 78.59%  | 68.08%  | 82.86%  | 78.56%  | 78.49% | 77.89% |

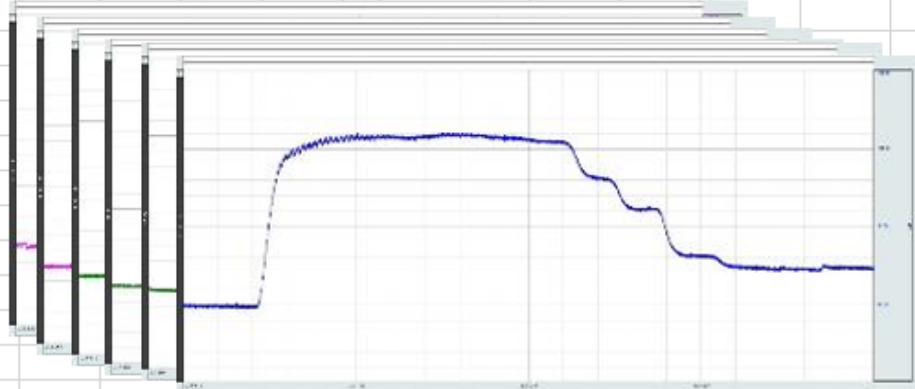



Fig .4B raw data

| Arg1/ $\beta$ -Actin value |      |      |       |       | Normalized to NG |         |         |         |         |
|----------------------------|------|------|-------|-------|------------------|---------|---------|---------|---------|
|                            | NG   | DG   | LF-DG | HF-DG |                  | NG      | DG      | LF-DG   | HF-DG   |
|                            | 0.50 | 0.72 | 0.39  | 0.53  |                  | 172.94% | 246.86% | 135.45% | 182.07% |
|                            | 0.20 | 0.47 | 0.19  | 0.24  |                  | 69.46%  | 160.52% | 64.75%  | 82.46%  |
|                            | 0.14 | 0.68 | 0.29  | 0.51  |                  | 49.51%  | 233.05% | 100.60% | 176.73% |
|                            | 0.29 | 1.09 | 0.55  | 0.31  |                  | 99.53%  | 375.60% | 191.03% | 107.50% |
|                            | 0.04 | 0.54 | 0.44  | 0.30  |                  | 12.11%  | 185.69% | 153.09% | 102.55% |
|                            | 0.21 | 0.46 | 0.51  | 0.29  |                  | 71.43%  | 158.97% | 174.71% | 101.45% |
|                            | 0.16 | 0.31 | 0.13  | 0.07  |                  | 56.55%  | 107.02% | 45.47%  | 24.61%  |
|                            | 0.34 | 0.62 | 0.54  | 0.23  |                  | 115.73% | 213.94% | 186.61% | 78.85%  |
|                            | 0.29 | 0.57 |       | 0.67  |                  | 101.22% | 196.06% |         | 229.40% |
|                            | 0.73 |      |       |       |                  | 251.52% |         |         |         |
| Mean                       | 0.29 | 0.60 | 0.38  | 0.35  | Mean             | 100.00% | 208.63% | 131.46% | 120.62% |

| Grayscale value (1~3) |           |           |           |           |
|-----------------------|-----------|-----------|-----------|-----------|
|                       | NG-1      | DG-1      | LF-DG-1   | HF-DG-1   |
| Arg1                  | 94731.00  | 130249.00 | 58089.00  | 70641.00  |
| $\beta$ -Actin        | 188924.00 | 181974.00 | 147914.00 | 133816.00 |
| Arg1/ $\beta$ -Actin  | 0.50      | 0.72      | 0.39      | 0.53      |
|                       |           |           |           |           |
|                       | NG-2      | DG-2      | LF-DG-2   | HF-DG-3   |
| Arg1                  | 40057.00  | 87992.00  | 34650.00  | 41028.00  |
| $\beta$ -Actin        | 198904.00 | 189060.00 | 184564.00 | 171606.00 |
| Arg1/ $\beta$ -Actin  | 0.20      | 0.47      | 0.19      | 0.24      |
|                       |           |           |           |           |
|                       | NG-3      | DG-3      | LF-DG-3   | HF-DG-3   |
| Arg1                  | 25956.00  | 112256.00 | 51399.00  | 96591.00  |
| $\beta$ -Actin        | 180802.00 | 166132.00 | 176216.00 | 188504.00 |
| Arg1/ $\beta$ -Actin  | 0.14      | 0.68      | 0.29      | 0.51      |

Arg1-western blot data (1~3)

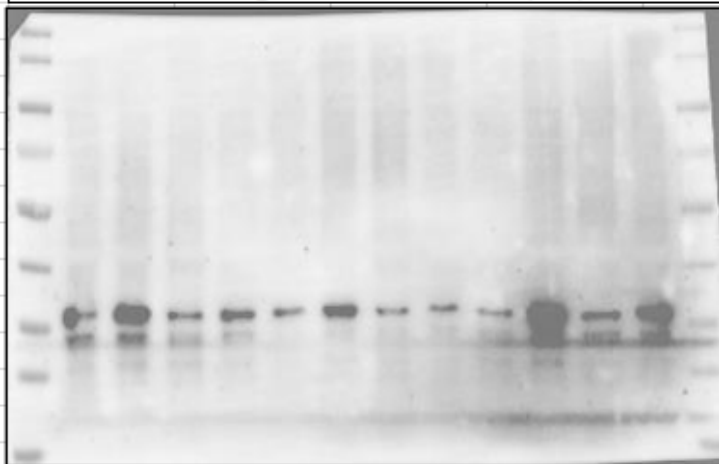

NG DG LF HF NG DG LF HF NG DG LF HF  
1 1 1 1 2 2 2 2 3 3 3 3

$\beta$ -Actin-western blot data (1~3)

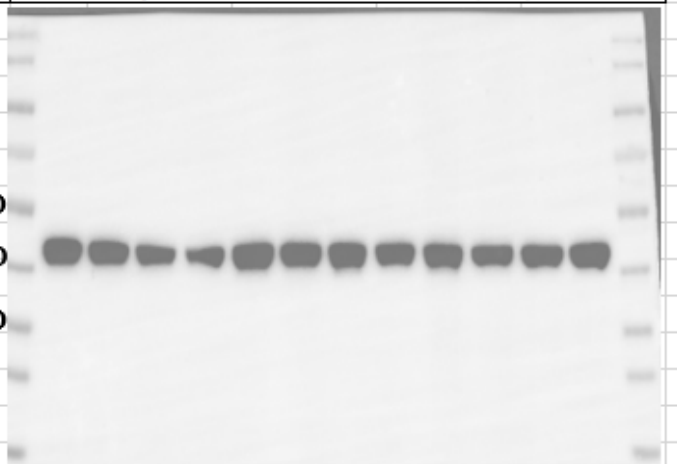

NG DG LF HF NG DG LF HF NG DG LF HF  
1 1 1 1 2 2 2 2 3 3 3 3

| Grayscale value (4~6) |           |           |           |           |
|-----------------------|-----------|-----------|-----------|-----------|
|                       | NG-4      | DG-4      | LF-DG-4   | HF-DG-4   |
| Arg1                  | 39826.00  | 140971.00 | 101719.00 | 57536.00  |
| $\beta$ -Actin        | 138004.00 | 129448.00 | 183652.00 | 184598.00 |
| Arg1/ $\beta$ -Actin  | 0.29      | 1.09      | 0.55      | 0.31      |
|                       | NG-5      | DG-5      | LF-DG-5   | HF-DG-5   |
| Arg1                  | 5765.00   | 74928.00  | 61803.00  | 50628.00  |
| $\beta$ -Actin        | 164225.00 | 139173.00 | 139232.00 | 170280.00 |
| Arg1/ $\beta$ -Actin  | 0.04      | 0.54      | 0.44      | 0.30      |
|                       | NG-6      | DG-6      | LF-DG-6   | HF-DG-6   |
| Arg1                  | 36597.00  | 82494.00  | 91159.00  | 65779.00  |
| $\beta$ -Actin        | 176708.00 | 178975.00 | 179959.00 | 223630.00 |
| Arg1/ $\beta$ -Actin  | 0.21      | 0.46      | 0.51      | 0.29      |

Arg1-western blot data (4~6)

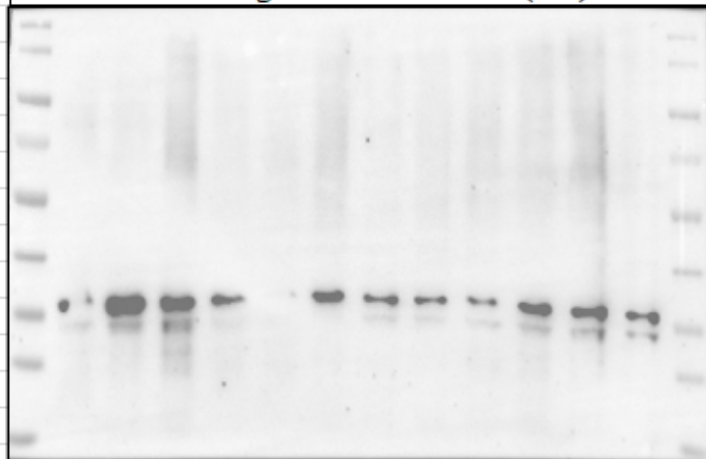

NG DG LF HF NG DG LF HF NG DG LF HF  
4 4 4 4 5 5 5 5 6 6 6 6

$\beta$ -Actin-western blot data(4~6)

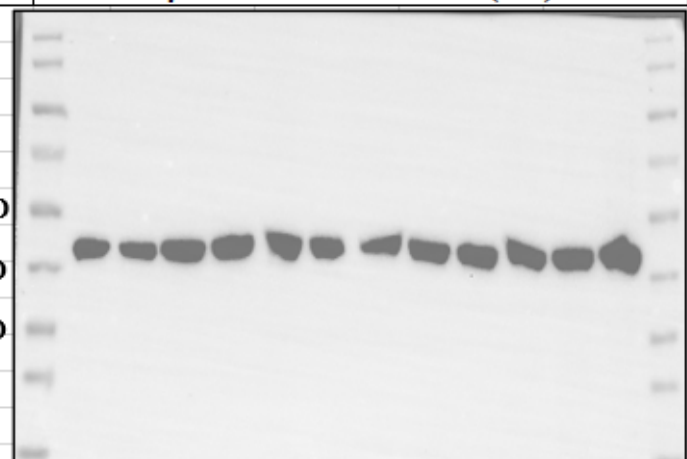

NG DG LF HF NG DG LF HF NG DG LF HF  
4 4 4 4 5 5 5 5 6 6 6 6

| Grayscale value (7~10) |           |           |           |           |
|------------------------|-----------|-----------|-----------|-----------|
|                        | NG-7      | DG-7      | LF-DG-7   | HF-DG-7   |
| Arg1                   | 32351.00  | 67403.00  | 29713.00  | 14572.00  |
| $\beta$ -Actin         | 197306.00 | 217223.00 | 225396.00 | 204193.00 |
| Arg1/ $\beta$ -Actin   | 0.16      | 0.31      | 0.13      | 0.07      |
|                        | NG-8      | DG-8      | LF-DG-8   | HF-DG-8   |
| Arg1                   | 67238.00  | 98743.00  | 98058.00  | 48338.00  |
| $\beta$ -Actin         | 200389.00 | 159189.00 | 181234.00 | 211431.00 |
| Arg1/ $\beta$ -Actin   | 0.34      | 0.62      | 0.54      | 0.23      |
|                        | NG-9      | DG-9      |           | HF-DG-9   |
| Arg1                   | 52626.00  | 120336.00 |           | 128970.00 |
| $\beta$ -Actin         | 179316.00 | 211683.00 |           | 193906.00 |
| Arg1/ $\beta$ -Actin   | 0.29      | 0.57      |           | 0.67      |
|                        | NG-10     |           |           |           |
| Arg1                   | 114674.00 |           |           |           |
| $\beta$ -Actin         | 157245.00 |           |           |           |
| Arg1/ $\beta$ -Actin   | 0.73      |           |           |           |

Arg1-western blot data (7~10)

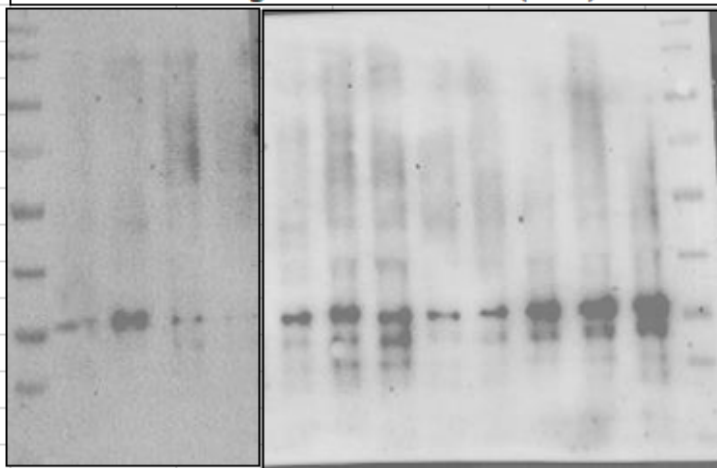

NG DG LF HF NG DG LF HF NG NG DF HF  
7 7 7 7 8 8 8 8 9 10 9 9

$\beta$ -Actin-western blot data (7~10)

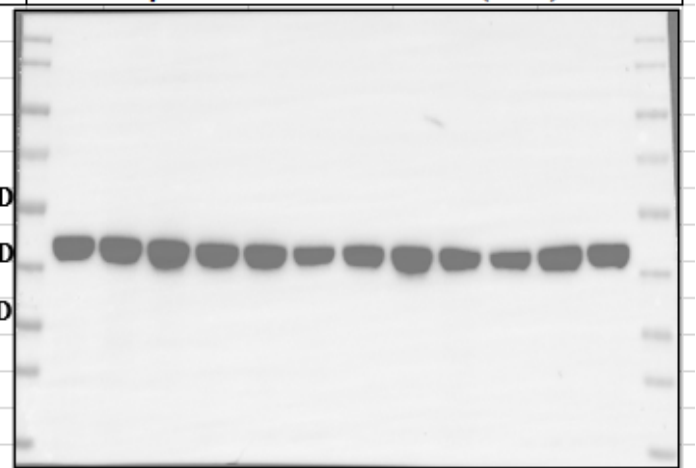

NG DG LF HF NG DG LF HF NG NG DF HF  
7 7 7 7 8 8 8 8 9 10 9 9

**Fig .4C raw data**

| NO level(μmol/g protein) |              |              |              |              |
|--------------------------|--------------|--------------|--------------|--------------|
|                          | NG           | DG           | LF-DG        | HF-DG        |
|                          | 23.429       | 15.911       | 13.642       | 16.044       |
|                          | 24.263       | 12.215       | 14.671       | 20.302       |
|                          | 18.652       | 12.596       | 20.855       | 17.824       |
|                          | 20.302       | 15.664       | 12.600       | 16.128       |
|                          | 18.515       | 11.206       | 16.423       | 18.754       |
|                          | 23.349       | 9.956        | 16.367       | 16.279       |
|                          | 19.688       | 13.419       | 13.087       | 17.059       |
|                          | 16.863       | 11.660       | 19.274       | 14.614       |
|                          | 17.398       | 11.444       |              | 15.668       |
|                          | 20.624       |              |              |              |
| <b>Mean</b>              | <b>20.31</b> | <b>12.67</b> | <b>15.87</b> | <b>16.96</b> |

**Protein concentration determination**

| Protein concentration OD value—<br>Sample diluted by 12.5 times (1) |       |       |       | OD    | Standard<br>concentration<br>(μg/mL) |  | Protein concentration(g/L) |       |       |       |  |
|---------------------------------------------------------------------|-------|-------|-------|-------|--------------------------------------|--|----------------------------|-------|-------|-------|--|
| NG                                                                  | DG    | LF-DG | HF-DG |       |                                      |  | NG                         | DG    | LF-DG | HF-DG |  |
| 0.244                                                               | 0.258 | 0.264 | 0.280 | 0.107 | 0                                    |  | 0.960                      | 1.065 | 1.110 | 1.229 |  |
| 0.271                                                               | 0.257 | 0.284 | 0.229 | 0.114 | 5                                    |  | 1.162                      | 1.057 | 1.259 | 0.848 |  |
| 0.255                                                               | 0.266 | 0.267 | 0.274 | 0.186 | 25                                   |  | 1.043                      | 1.125 | 1.132 | 1.184 |  |
| 0.229                                                               | 0.265 | 0.263 | 0.263 | 0.194 | 50                                   |  | 0.848                      | 1.117 | 1.102 | 1.102 |  |
| 0.249                                                               | 0.288 |       | 0.282 | 0.322 | 125                                  |  | 0.998                      | 1.289 |       | 1.244 |  |
|                                                                     |       |       |       | 0.531 | 250                                  |  |                            |       |       |       |  |
| Protein concentration OD value—<br>Sample diluted by 12.5 times (2) |       |       |       | OD    | Standard<br>concentration<br>(μg/mL) |  | Protein concentration(g/L) |       |       |       |  |
| NG                                                                  | DG    | LF-DG | HF-DG |       |                                      |  | NG                         | DG    | LF-DG | HF-DG |  |
| 0.238                                                               | 0.247 | 0.270 | 0.195 | 0.093 | 0                                    |  | 1.227                      | 1.303 | 1.498 | 0.863 |  |
| 0.183                                                               | 0.237 | 0.213 | 0.210 | 0.096 | 5                                    |  | 0.762                      | 1.219 | 1.016 | 0.990 |  |
| 0.218                                                               | 0.219 | 0.226 | 0.211 | 0.132 | 25                                   |  | 1.058                      | 1.066 | 1.125 | 0.999 |  |
| 0.261                                                               | 0.213 | 0.238 | 0.251 | 0.167 | 50                                   |  | 1.421                      | 1.016 | 1.227 | 1.337 |  |
| 0.244                                                               |       |       |       | 0.282 | 125                                  |  | 1.278                      |       |       |       |  |
|                                                                     |       |       |       | 0.460 | 250                                  |  |                            |       |       |       |  |

**NO level determination**

| NO level-OD value |       |       |       | OD value           |       | NO level(μM/g prot) |        |        |        |
|-------------------|-------|-------|-------|--------------------|-------|---------------------|--------|--------|--------|
| NG                | DG    | LF-DG | HF-DG | Standard<br>(20μM) | Blank | NG                  | DG     | LF-DG  | HF-DG  |
| 0.221             | 0.181 | 0.168 | 0.201 | 0.203              | 0.059 | 23.429              | 15.911 | 13.642 | 16.044 |
| 0.262             | 0.152 | 0.192 | 0.183 |                    |       | 24.263              | 12.215 | 14.671 | 20.302 |
| 0.199             | 0.161 | 0.229 | 0.211 |                    |       | 18.652              | 12.596 | 20.855 | 17.824 |
| 0.183             | 0.185 | 0.159 | 0.187 |                    |       | 20.302              | 15.664 | 12.600 | 16.128 |
| 0.192             | 0.163 |       | 0.227 |                    |       | 18.515              | 11.206 |        | 18.754 |
| NO level-OD value |       |       |       | OD value           |       | NO level(μM/g prot) |        |        |        |
| NG                | DG    | LF-DG | HF-DG | Standard<br>(20μM) | Blank | NG                  | DG     | LF-DG  | HF-DG  |
| 0.275             | 0.159 | 0.245 | 0.167 | 0.211              | 0.063 | 23.349              | 9.956  | 16.423 | 16.279 |
| 0.174             | 0.184 | 0.186 | 0.188 |                    |       | 19.688              | 13.419 | 16.367 | 17.059 |
| 0.195             | 0.155 | 0.172 | 0.171 |                    |       | 16.863              | 11.660 | 13.087 | 14.614 |
| 0.246             | 0.149 | 0.238 | 0.218 |                    |       | 17.398              | 11.444 | 19.274 | 15.668 |
| 0.258             |       |       |       |                    |       | 20.624              |        |        |        |

**Fig .5C raw data**

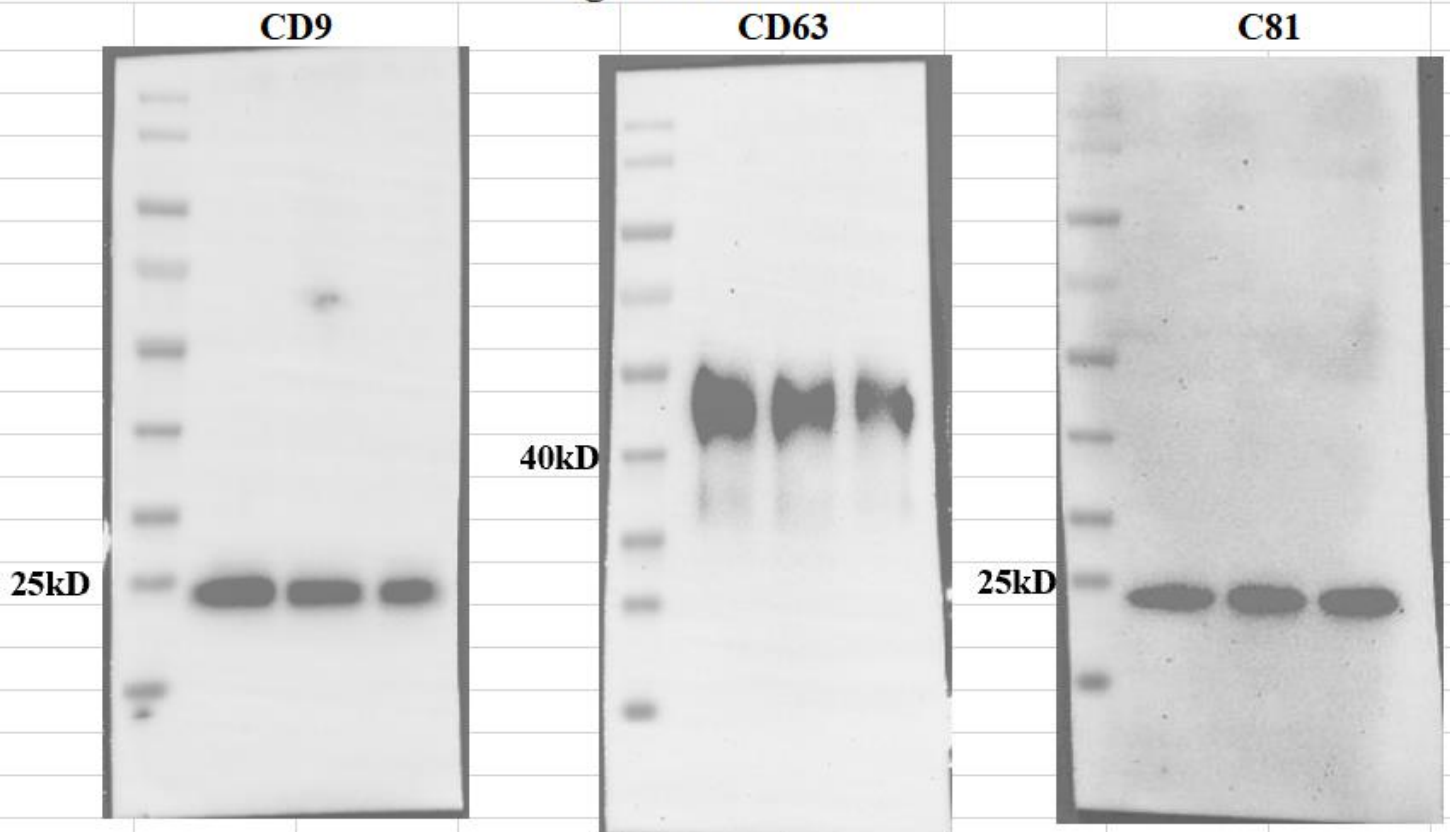

**Fig .5D raw data**

| Arg activity/protein |             |             |             |             | Normalized to NG |                |                |                |                |
|----------------------|-------------|-------------|-------------|-------------|------------------|----------------|----------------|----------------|----------------|
|                      | NG          | DG          | LF-DG       | HF-DG       |                  | NG             | DG             | LF-DG          | HF-DG          |
|                      | 0.047       | 0.082       | 0.071       | 0.080       |                  | 78.42%         | 135.22%        | 116.48%        | 132.25%        |
|                      | 0.051       | 0.093       | 0.091       | 0.067       |                  | 84.84%         | 152.94%        | 150.44%        | 111.33%        |
|                      | 0.058       | 0.089       | 0.077       | 0.083       |                  | 96.48%         | 147.32%        | 127.54%        | 136.51%        |
|                      | 0.071       | 0.087       | 0.063       | 0.068       |                  | 117.24%        | 143.63%        | 104.17%        | 111.73%        |
|                      | 0.048       | 0.081       | 0.069       | 0.062       |                  | 79.51%         | 133.23%        | 114.24%        | 103.16%        |
|                      | 0.079       | 0.101       | 0.102       | 0.076       |                  | 130.50%        | 167.23%        | 167.96%        | 124.87%        |
|                      | 0.065       | 0.105       | 0.070       | 0.068       |                  | 107.35%        | 173.77%        | 115.17%        | 112.34%        |
|                      | 0.060       | 0.107       | 0.079       | 0.063       |                  | 99.34%         | 176.80%        | 130.05%        | 103.22%        |
|                      | 0.058       | 0.087       |             | 0.077       |                  | 96.37%         | 143.16%        |                | 126.45%        |
|                      | 0.067       |             |             |             |                  | 109.96%        |                |                |                |
| <b>Mean</b>          | <b>0.06</b> | <b>0.09</b> | <b>0.08</b> | <b>0.07</b> | <b>Mean</b>      | <b>100.00%</b> | <b>152.59%</b> | <b>128.26%</b> | <b>117.98%</b> |

**Protein concentration determination**

**Protein concentration OD value—  
Sample diluted by 12.5 times (1)**

| NG    | DG    | LF-DG | HF-DG |
|-------|-------|-------|-------|
| 0.360 | 0.318 | 0.287 | 0.329 |
| 0.310 | 0.344 | 0.311 | 0.340 |
| 0.330 | 0.292 | 0.338 | 0.349 |
| 0.289 | 0.360 | 0.276 | 0.303 |
| 0.319 | 0.320 |       | 0.290 |

| OD    | Standard concentration (µg/mL) |
|-------|--------------------------------|
| 0.097 | 0                              |
| 0.112 | 5                              |
| 0.124 | 25                             |
| 0.171 | 50                             |
| 0.268 | 125                            |
| 0.403 | 250                            |

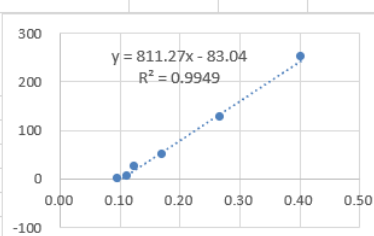

**Protein concentration(g/L)**

| NG    | DG    | LF-DG | HF-DG |
|-------|-------|-------|-------|
| 2.613 | 2.187 | 1.872 | 2.298 |
| 2.106 | 2.450 | 2.116 | 2.410 |
| 2.308 | 1.923 | 2.390 | 2.501 |
| 1.893 | 2.613 | 1.761 | 2.035 |
| 2.197 | 2.207 |       | 1.903 |

**Protein concentration OD value—  
Sample diluted by 12.5 times (2)**

| NG    | DG    | LF-DG | HF-DG |
|-------|-------|-------|-------|
| 0.350 | 0.359 | 0.379 | 0.312 |
| 0.302 | 0.328 | 0.328 | 0.336 |
| 0.333 | 0.355 | 0.235 | 0.317 |
| 0.371 | 0.297 | 0.361 | 0.362 |
| 0.314 |       |       |       |

| OD    | Standard concentration (µg/mL) |
|-------|--------------------------------|
| 0.108 | 0                              |
| 0.116 | 5                              |
| 0.150 | 25                             |
| 0.196 | 50                             |
| 0.290 | 125                            |
| 0.436 | 250                            |

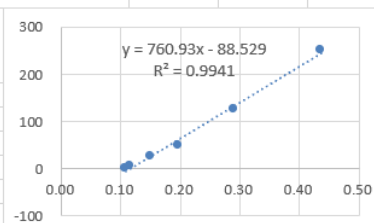

**Protein concentration(g/L)**

| NG    | DG    | LF-DG | HF-DG |
|-------|-------|-------|-------|
| 2.225 | 2.306 | 2.500 | 1.863 |
| 1.764 | 2.016 | 2.015 | 2.091 |
| 2.061 | 2.273 | 1.127 | 1.907 |
| 2.424 | 1.718 | 2.331 | 2.338 |
| 1.883 |       |       |       |

**Arg activity determination**

**Arg activity-OD value**

| NG    | DG    | LF-DG | HF-DG |
|-------|-------|-------|-------|
| 0.124 | 0.179 | 0.132 | 0.184 |
| 0.108 | 0.227 | 0.193 | 0.163 |
| 0.135 | 0.172 | 0.185 | 0.207 |
| 0.134 | 0.227 | 0.111 | 0.138 |
| 0.106 | 0.178 |       | 0.119 |

**Arg activity/protein**

| NG    | DG    | LF-DG | HF-DG |
|-------|-------|-------|-------|
| 0.047 | 0.082 | 0.071 | 0.080 |
| 0.051 | 0.093 | 0.091 | 0.067 |
| 0.058 | 0.089 | 0.077 | 0.083 |
| 0.071 | 0.087 | 0.063 | 0.068 |
| 0.048 | 0.081 |       | 0.062 |

**Arg activity-OD value**

| NG    | DG    | LF-DG | HF-DG |
|-------|-------|-------|-------|
| 0.176 | 0.234 | 0.173 | 0.141 |
| 0.115 | 0.212 | 0.205 | 0.142 |
| 0.124 | 0.243 | 0.079 | 0.119 |
| 0.142 | 0.149 | 0.184 | 0.179 |
| 0.125 |       |       |       |

**Arg activity/protein**

| NG    | DG    | LF-DG | HF-DG |
|-------|-------|-------|-------|
| 0.079 | 0.101 | 0.069 | 0.076 |
| 0.065 | 0.105 | 0.102 | 0.068 |
| 0.060 | 0.107 | 0.070 | 0.063 |
| 0.058 | 0.087 | 0.079 | 0.077 |
| 0.067 |       |       |       |

**Fig .6A raw data**

| Aorta contract value(mN)  |        |        |        |        |        |        | Relaxation(%NE)           |        |        |        |        |        |        |        |
|---------------------------|--------|--------|--------|--------|--------|--------|---------------------------|--------|--------|--------|--------|--------|--------|--------|
|                           | NG-1   | NG-2   | NG-3   | NG-4   | NG-5   | NG-6   |                           | NG-1   | NG-2   | NG-3   | NG-4   | NG-5   | NG-6   | Mean   |
| ACh(0M)                   | 13.010 | 16.064 | 16.259 | 13.085 | 12.725 | 16.157 | ACh(1*10 <sup>-9</sup> M) | 9.12%  | 4.94%  | 10.12% | 6.53%  | 11.50% | 1.27%  | 7.25%  |
| ACh(1*10 <sup>-9</sup> M) | 11.824 | 15.271 | 14.613 | 12.231 | 11.261 | 15.951 | ACh(5*10 <sup>-9</sup> M) | 11.43% | 7.17%  | 11.30% | 8.17%  | 11.06% | 4.67%  | 8.97%  |
| ACh(5*10 <sup>-9</sup> M) | 11.523 | 14.913 | 14.421 | 12.016 | 11.318 | 15.403 | ACh(1*10 <sup>-8</sup> M) | 15.93% | 10.96% | 7.06%  | 8.90%  | 17.39% | 7.14%  | 11.23% |
| ACh(1*10 <sup>-8</sup> M) | 10.938 | 14.304 | 15.111 | 11.921 | 10.512 | 15.004 | ACh(5*10 <sup>-8</sup> M) | 31.68% | 20.00% | 15.28% | 19.66% | 19.83% | 18.84% | 20.88% |
| ACh(5*10 <sup>-8</sup> M) | 8.889  | 12.852 | 13.775 | 10.513 | 10.201 | 13.113 | ACh(1*10 <sup>-7</sup> M) | 48.47% | 42.80% | 29.20% | 45.03% | 41.56% | 53.03% | 43.35% |
| ACh(1*10 <sup>-7</sup> M) | 6.704  | 9.189  | 11.512 | 7.193  | 7.437  | 7.589  | ACh(5*10 <sup>-7</sup> M) | 67.96% | 58.06% | 56.28% | 50.90% | 46.55% | 67.12% | 57.81% |
| ACh(5*10 <sup>-7</sup> M) | 4.168  | 6.737  | 7.108  | 6.425  | 6.801  | 5.313  | ACh(1*10 <sup>-6</sup> M) | 78.41% | 68.18% | 76.81% | 76.61% | 72.40% | 82.03% | 75.74% |
| ACh(1*10 <sup>-6</sup> M) | 2.809  | 5.112  | 3.771  | 3.061  | 3.512  | 2.903  | ACh(5*10 <sup>-6</sup> M) | 88.33% | 87.46% | 86.11% | 91.27% | 80.24% | 84.48% | 86.32% |
| ACh(5*10 <sup>-6</sup> M) | 1.518  | 2.015  | 2.258  | 1.142  | 2.514  | 2.508  | ACh(1*10 <sup>-5</sup> M) | 92.14% | 88.15% | 88.09% | 93.72% | 81.96% | 85.04% | 88.18% |
| ACh(1*10 <sup>-5</sup> M) | 1.023  | 1.904  | 1.937  | 0.822  | 2.295  | 2.417  |                           |        |        |        |        |        |        |        |

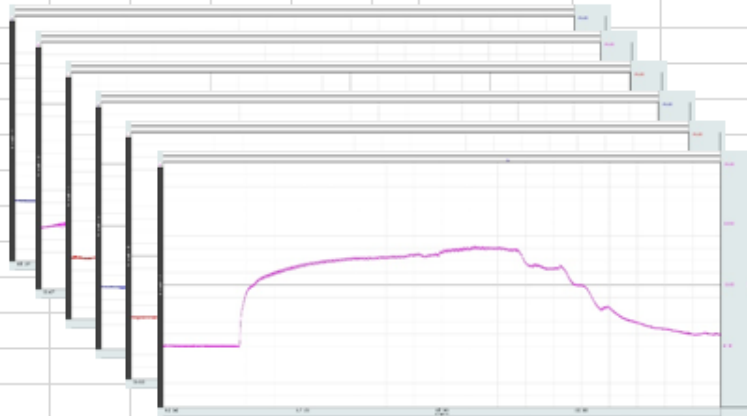

| Aorta contract value(mN)  |        |        |        |        |        |        | Relaxation(%NE)           |        |        |        |        |        |        |        |
|---------------------------|--------|--------|--------|--------|--------|--------|---------------------------|--------|--------|--------|--------|--------|--------|--------|
|                           | HG-1   | HG-2   | HG-3   | HG-4   | HG-5   | HG-6   |                           | HG-1   | HG-2   | HG-3   | HG-4   | HG-5   | HG-6   | Mean   |
| ACh(0M)                   | 23.621 | 11.416 | 12.426 | 19.067 | 13.625 | 13.231 | ACh(1*10 <sup>-9</sup> M) | 2.57%  | 3.62%  | 6.07%  | 5.52%  | 4.34%  | 3.02%  | 4.19%  |
| ACh(1*10 <sup>-9</sup> M) | 23.014 | 11.003 | 11.672 | 18.014 | 13.033 | 12.832 | ACh(5*10 <sup>-9</sup> M) | 3.46%  | 4.60%  | 7.23%  | 5.74%  | 7.84%  | 4.72%  | 5.60%  |
| ACh(5*10 <sup>-9</sup> M) | 22.804 | 10.891 | 11.528 | 17.973 | 12.557 | 12.606 | ACh(1*10 <sup>-8</sup> M) | 5.13%  | 6.81%  | 10.42% | 7.95%  | 12.84% | 7.78%  | 8.49%  |
| ACh(1*10 <sup>-8</sup> M) | 22.409 | 10.638 | 11.131 | 17.551 | 11.875 | 12.201 | ACh(5*10 <sup>-8</sup> M) | 9.76%  | 17.03% | 16.71% | 12.50% | 26.55% | 10.95% | 15.59% |
| ACh(5*10 <sup>-8</sup> M) | 21.315 | 9.472  | 10.349 | 16.683 | 10.007 | 11.782 | ACh(1*10 <sup>-7</sup> M) | 24.19% | 31.46% | 26.63% | 17.62% | 41.57% | 36.29% | 29.63% |
| ACh(1*10 <sup>-7</sup> M) | 17.906 | 7.825  | 9.117  | 15.708 | 7.961  | 8.429  | ACh(5*10 <sup>-7</sup> M) | 31.36% | 44.56% | 44.17% | 36.31% | 63.24% | 54.55% | 45.70% |
| ACh(5*10 <sup>-7</sup> M) | 16.213 | 6.329  | 6.937  | 12.143 | 5.008  | 6.013  | ACh(1*10 <sup>-6</sup> M) | 56.79% | 55.31% | 52.58% | 48.07% | 87.52% | 59.84% | 60.02% |
| ACh(1*10 <sup>-6</sup> M) | 10.207 | 5.102  | 5.892  | 9.902  | 1.701  | 5.314  | ACh(5*10 <sup>-6</sup> M) | 64.28% | 69.98% | 55.64% | 63.14% | 69.09% | 66.96% | 64.85% |
| ACh(5*10 <sup>-6</sup> M) | 8.438  | 3.427  | 5.512  | 7.028  | 4.211  | 4.372  | ACh(1*10 <sup>-5</sup> M) | 65.07% | 71.41% | 57.13% | 65.69% | 70.97% | 68.26% | 66.42% |
| ACh(1*10 <sup>-5</sup> M) | 8.251  | 3.264  | 5.327  | 6.542  | 3.955  | 4.199  |                           |        |        |        |        |        |        |        |

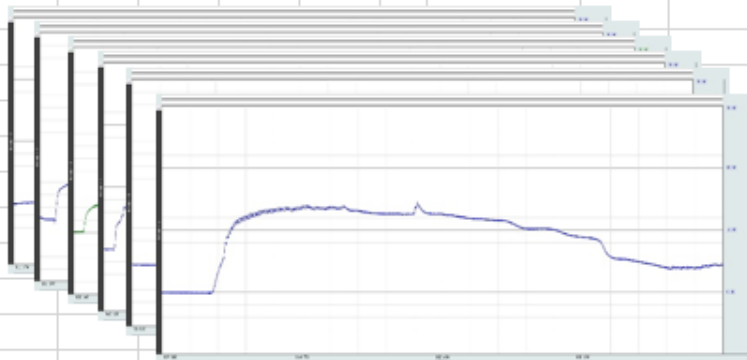

**Aorta contract value(mN)**

**Relaxation(%NE)**

|                            | 2FE+H<br>G-1 | 2FE+H<br>G-2 | 2FE+H<br>G-3 | 2FE+H<br>G-4 | 2FE+H<br>G-5 | 2FE+H<br>G-6 |
|----------------------------|--------------|--------------|--------------|--------------|--------------|--------------|
| ACh(0M)                    | 11.011       | 10.152       | 13.823       | 14.558       | 11.745       | 11.100       |
| ACh( $1 \times 10^{-9}$ M) | 10.766       | 10.023       | 13.556       | 14.201       | 11.517       | 11.003       |
| ACh( $5 \times 10^{-9}$ M) | 10.466       | 9.749        | 13.314       | 14.018       | 11.173       | 10.954       |
| ACh( $1 \times 10^{-8}$ M) | 9.667        | 8.918        | 12.331       | 13.519       | 11.152       | 10.554       |
| ACh( $5 \times 10^{-8}$ M) | 8.422        | 8.433        | 10.578       | 11.547       | 9.841        | 9.225        |
| ACh( $1 \times 10^{-7}$ M) | 6.904        | 6.661        | 6.109        | 8.613        | 7.692        | 8.368        |
| ACh( $5 \times 10^{-7}$ M) | 5.562        | 4.112        | 5.013        | 5.553        | 4.891        | 6.625        |
| ACh( $1 \times 10^{-6}$ M) | 4.449        | 3.213        | 4.802        | 5.303        | 3.521        | 4.451        |
| ACh( $5 \times 10^{-6}$ M) | 3.374        | 2.003        | 4.421        | 4.502        | 3.106        | 2.713        |
| ACh( $1 \times 10^{-5}$ M) | 3.011        | 1.904        | 4.419        | 4.395        | 2.832        | 2.246        |

|                            | 2FE+H<br>G-1 | 2FE+H<br>G-2 | 2FE+H<br>G-3 | 2FE+H<br>G-4 | 2FE+H<br>G-5 | 2FE+H<br>G-6 | Mean   |
|----------------------------|--------------|--------------|--------------|--------------|--------------|--------------|--------|
| ACh( $1 \times 10^{-9}$ M) | 2.23%        | 1.27%        | 1.93%        | 2.45%        | 1.94%        | 0.87%        | 1.78%  |
| ACh( $5 \times 10^{-9}$ M) | 4.95%        | 3.97%        | 3.68%        | 3.71%        | 4.87%        | 1.32%        | 3.75%  |
| ACh( $1 \times 10^{-8}$ M) | 12.21%       | 12.16%       | 10.79%       | 7.14%        | 5.05%        | 4.92%        | 8.71%  |
| ACh( $5 \times 10^{-8}$ M) | 23.51%       | 16.93%       | 23.48%       | 20.68%       | 16.21%       | 16.89%       | 19.62% |
| ACh( $1 \times 10^{-7}$ M) | 37.30%       | 34.39%       | 55.81%       | 40.84%       | 34.51%       | 24.61%       | 37.91% |
| ACh( $5 \times 10^{-7}$ M) | 49.49%       | 59.50%       | 63.73%       | 61.86%       | 58.36%       | 40.32%       | 55.54% |
| ACh( $1 \times 10^{-6}$ M) | 59.59%       | 68.35%       | 65.26%       | 63.57%       | 70.02%       | 59.90%       | 64.45% |
| ACh( $5 \times 10^{-6}$ M) | 69.36%       | 80.27%       | 68.02%       | 69.08%       | 73.55%       | 75.56%       | 72.64% |
| ACh( $1 \times 10^{-5}$ M) | 72.65%       | 81.25%       | 68.03%       | 69.81%       | 75.89%       | 79.77%       | 74.57% |

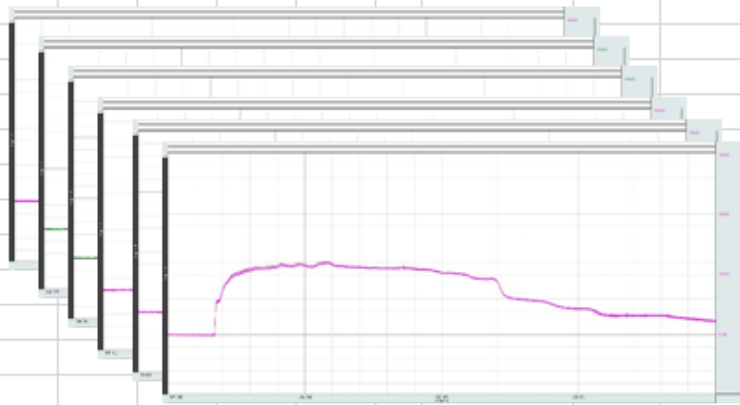

**Aorta contract value(mN)**

**Relaxation(%NE)**

|                            | 10FE+<br>HG-1 | 10FE+<br>HG-2 | 10FE+<br>HG-3 | 10FE+<br>HG-4 | 10FE+<br>HG-5 | 10FE+<br>HG-6 |
|----------------------------|---------------|---------------|---------------|---------------|---------------|---------------|
| ACh(0M)                    | 12.434        | 13.471        | 14.086        | 12.207        | 18.682        | 15.041        |
| ACh( $1 \times 10^{-9}$ M) | 11.816        | 12.664        | 13.028        | 10.982        | 18.212        | 14.607        |
| ACh( $5 \times 10^{-9}$ M) | 11.782        | 12.572        | 12.557        | 10.793        | 17.933        | 14.451        |
| ACh( $1 \times 10^{-8}$ M) | 10.437        | 12.036        | 11.891        | 8.754         | 16.812        | 14.113        |
| ACh( $5 \times 10^{-8}$ M) | 9.515         | 10.937        | 9.823         | 6.524         | 14.324        | 12.337        |
| ACh( $1 \times 10^{-7}$ M) | 7.833         | 6.931         | 7.504         | 6.102         | 10.102        | 7.008         |
| ACh( $5 \times 10^{-7}$ M) | 6.342         | 4.095         | 5.516         | 4.322         | 7.912         | 5.893         |
| ACh( $1 \times 10^{-6}$ M) | 5.219         | 3.355         | 3.311         | 3.209         | 4.001         | 4.323         |
| ACh( $5 \times 10^{-6}$ M) | 2.822         | 2.771         | 2.835         | 2.945         | 3.513         | 3.705         |
| ACh( $1 \times 10^{-5}$ M) | 2.504         | 2.731         | 2.801         | 2.876         | 3.442         | 3.882         |

|                            | 10FE+H<br>G-1 | 10FE+H<br>G-2 | 10FE+H<br>G-3 | 10FE+H<br>G-4 | 10FE+H<br>G-5 | 10FE+H<br>G-6 | Mean   |
|----------------------------|---------------|---------------|---------------|---------------|---------------|---------------|--------|
| ACh( $1 \times 10^{-9}$ M) | 4.97%         | 5.99%         | 7.51%         | 10.04%        | 2.52%         | 2.89%         | 5.65%  |
| ACh( $5 \times 10^{-9}$ M) | 5.24%         | 6.67%         | 10.85%        | 11.58%        | 4.01%         | 3.92%         | 7.05%  |
| ACh( $1 \times 10^{-8}$ M) | 16.06%        | 10.65%        | 15.58%        | 28.29%        | 10.01%        | 6.17%         | 14.46% |
| ACh( $5 \times 10^{-8}$ M) | 23.48%        | 18.81%        | 30.26%        | 46.56%        | 23.33%        | 17.98%        | 26.74% |
| ACh( $1 \times 10^{-7}$ M) | 37.00%        | 48.55%        | 46.73%        | 50.01%        | 45.93%        | 53.41%        | 46.94% |
| ACh( $5 \times 10^{-7}$ M) | 48.99%        | 69.60%        | 60.84%        | 64.59%        | 57.65%        | 60.82%        | 60.42% |
| ACh( $1 \times 10^{-6}$ M) | 58.03%        | 75.09%        | 76.49%        | 73.71%        | 78.58%        | 71.26%        | 72.19% |
| ACh( $5 \times 10^{-6}$ M) | 77.30%        | 79.43%        | 79.87%        | 75.87%        | 81.20%        | 75.37%        | 78.17% |
| ACh( $1 \times 10^{-5}$ M) | 79.86%        | 79.73%        | 80.12%        | 76.44%        | 81.58%        | 74.19%        | 78.65% |

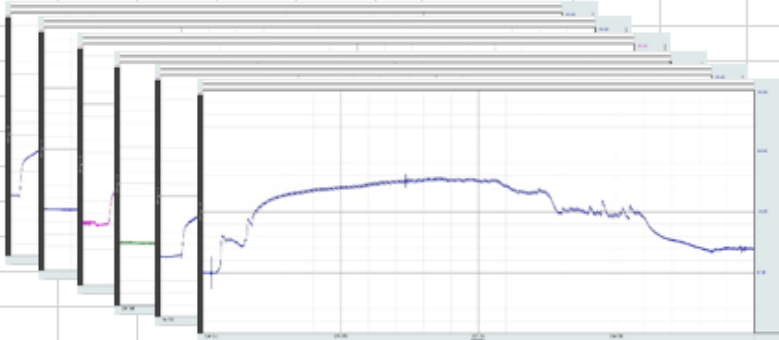



**Aorta contract value(mN)**

**Relaxation(%NE)**

|                            | ABH+ HG-1 | ABH+ HG-2 | ABH+ HG-3 | ABH+ HG-4 | ABH+ HG-5 | ABH+ HG-6 |
|----------------------------|-----------|-----------|-----------|-----------|-----------|-----------|
| ACh(0M)                    | 10.152    | 16.406    | 13.842    | 11.401    | 10.964    | 7.224     |
| ACh( $1 \times 10^{-9}$ M) | 9.825     | 16.007    | 13.153    | 10.924    | 10.122    | 6.635     |
| ACh( $5 \times 10^{-9}$ M) | 9.719     | 15.821    | 13.017    | 10.658    | 9.907     | 5.711     |
| ACh( $1 \times 10^{-8}$ M) | 9.142     | 14.479    | 12.115    | 10.519    | 9.259     | 5.872     |
| ACh( $5 \times 10^{-8}$ M) | 8.108     | 11.301    | 11.593    | 9.267     | 8.221     | 4.501     |
| ACh( $1 \times 10^{-7}$ M) | 5.517     | 8.056     | 7.251     | 7.629     | 6.046     | 4.023     |
| ACh( $5 \times 10^{-7}$ M) | 5.003     | 4.821     | 4.941     | 4.519     | 4.005     | 2.657     |
| ACh( $1 \times 10^{-6}$ M) | 3.216     | 3.713     | 3.689     | 3.415     | 3.158     | 1.846     |
| ACh( $5 \times 10^{-6}$ M) | 2.305     | 2.833     | 2.773     | 2.317     | 2.441     | 1.003     |
| ACh( $1 \times 10^{-5}$ M) | 1.977     | 2.275     | 1.982     | 1.806     | 2.501     | 0.931     |

|                            | ABH+H G-1 | ABH+H G-2 | ABH+H G-3 | ABH+H G-4 | ABH+H G-5 | ABH+H G-6 | Mean   |
|----------------------------|-----------|-----------|-----------|-----------|-----------|-----------|--------|
| ACh( $1 \times 10^{-9}$ M) | 3.22%     | 2.43%     | 4.98%     | 4.18%     | 7.68%     | 8.15%     | 5.11%  |
| ACh( $5 \times 10^{-9}$ M) | 4.27%     | 3.57%     | 5.96%     | 6.52%     | 9.64%     | 20.94%    | 8.48%  |
| ACh( $1 \times 10^{-8}$ M) | 9.95%     | 11.75%    | 12.48%    | 7.74%     | 15.55%    | 18.72%    | 12.70% |
| ACh( $5 \times 10^{-8}$ M) | 20.13%    | 31.12%    | 16.25%    | 18.72%    | 25.02%    | 37.69%    | 24.82% |
| ACh( $1 \times 10^{-7}$ M) | 45.66%    | 50.90%    | 47.62%    | 33.08%    | 44.86%    | 44.31%    | 44.40% |
| ACh( $5 \times 10^{-7}$ M) | 50.72%    | 70.61%    | 64.30%    | 60.36%    | 63.47%    | 63.22%    | 62.12% |
| ACh( $1 \times 10^{-6}$ M) | 68.32%    | 77.37%    | 73.35%    | 70.05%    | 71.20%    | 74.45%    | 72.45% |
| ACh( $5 \times 10^{-6}$ M) | 77.30%    | 82.73%    | 79.97%    | 79.68%    | 77.74%    | 86.12%    | 80.59% |
| ACh( $1 \times 10^{-5}$ M) | 80.53%    | 86.13%    | 85.68%    | 84.16%    | 77.19%    | 87.11%    | 83.47% |

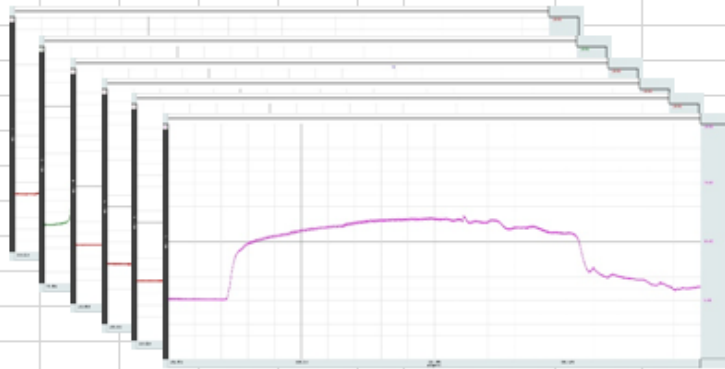

**Fig .6B raw data**

**NO level (μmol/g prot)**

|             | NG           | HG           | 2FE+HG       | 10FE+HG      | ABH+HG       |
|-------------|--------------|--------------|--------------|--------------|--------------|
|             | 20.166       | 12.076       | 15.337       | 16.422       | 15.968       |
|             | 18.019       | 9.949        | 13.604       | 14.928       | 16.670       |
|             | 18.260       | 11.894       | 16.748       | 20.303       | 18.446       |
|             | 22.368       | 11.624       | 15.208       | 13.578       | 19.326       |
|             | 15.163       | 12.252       | 15.820       | 17.164       | 15.643       |
|             | 19.623       | 11.511       | 14.878       | 15.899       | 16.776       |
| <b>Mean</b> | <b>18.93</b> | <b>11.55</b> | <b>15.27</b> | <b>16.38</b> | <b>17.14</b> |

**Protein concentration determination**

| Protein concentration OD value—<br>Sample diluted by 12.5 times (1) |       |        |         |        | OD    | Standard<br>concentration<br>(μg/mL) |       | Protein concentration(g/L) |       |        |         |        |
|---------------------------------------------------------------------|-------|--------|---------|--------|-------|--------------------------------------|-------|----------------------------|-------|--------|---------|--------|
| NG                                                                  | HG    | 2FE+HG | 10FE+HG | ABH+HG | 0.099 | 0                                    |       | NG                         | HG    | 2FE+HG | 10FE+HG | ABH+HG |
| 0.197                                                               | 0.203 | 0.189  | 0.193   | 0.224  | 0.111 | 5                                    | 0.891 | 0.946                      | 0.816 | 0.853  | 1.142   |        |
| 0.236                                                               | 0.188 | 0.212  | 0.211   | 0.229  | 0.137 | 25                                   | 1.253 | 0.807                      | 1.030 | 1.021  | 1.192   |        |
| 0.211                                                               | 0.223 | 0.234  | 0.205   | 0.198  | 0.168 | 50                                   | 1.021 | 1.132                      | 1.235 | 0.965  | 0.900   |        |
|                                                                     |       |        |         |        | 0.265 | 125                                  |       |                            |       |        |         |        |
|                                                                     |       |        |         |        | 0.439 | 250                                  |       |                            |       |        |         |        |
| Protein concentration OD value—<br>Sample diluted by 12.5 times (2) |       |        |         |        | OD    | Standard<br>concentration<br>(μg/mL) |       | Protein concentration(g/L) |       |        |         |        |
| NG                                                                  | HG    | 2FE+HG | 10FE+HG | ABH+HG | 0.116 | 0                                    |       | NG                         | HG    | 2FE+HG | 10FE+HG | ABH+HG |
| 0.238                                                               | 0.274 | 0.271  | 0.293   | 0.211  | 0.136 | 5                                    | 0.929 | 1.229                      | 1.204 | 1.387  | 0.706   |        |
| 0.257                                                               | 0.209 | 0.215  | 0.239   | 0.226  | 0.166 | 25                                   | 1.088 | 0.689                      | 0.739 | 0.938  | 0.830   |        |
| 0.236                                                               | 0.251 | 0.249  | 0.247   | 0.291  | 0.209 | 50                                   | 0.913 | 1.038                      | 1.021 | 1.005  | 1.370   |        |
|                                                                     |       |        |         |        | 0.314 | 125                                  |       |                            |       |        |         |        |
|                                                                     |       |        |         |        | 0.500 | 250                                  |       |                            |       |        |         |        |

**NO level determination**

| NO level-OD value |       |        |         |        | OD value           |       | NO level(μM/g prot) |        |        |         |        |
|-------------------|-------|--------|---------|--------|--------------------|-------|---------------------|--------|--------|---------|--------|
| NG                | HG    | 2FE+HG | 10FE+HG | ABH+HG | Standard<br>(20μM) | Blank | NG                  | HG     | 2FE+HG | 10FE+HG | ABH+HG |
| 0.191             | 0.143 | 0.151  | 0.162   | 0.193  | 0.206              | 0.059 | 20.166              | 12.076 | 15.337 | 16.422  | 15.968 |
| 0.225             | 0.118 | 0.162  | 0.171   | 0.205  |                    |       | 18.019              | 9.949  | 13.604 | 14.928  | 16.670 |
| 0.196             | 0.158 | 0.211  | 0.203   | 0.181  |                    |       | 18.260              | 11.894 | 16.748 | 20.303  | 18.446 |
| NO level-OD value |       |        |         |        | OD value           |       | NO level(μM/g prot) |        |        |         |        |
| NG                | HG    | 2FE+HG | 10FE+HG | ABH+HG | Standard<br>(20μM) | Blank | NG                  | HG     | 2FE+HG | 10FE+HG | ABH+HG |
| 0.221             | 0.171 | 0.202  | 0.206   | 0.166  | 0.215              | 0.061 | 22.368              | 11.624 | 15.208 | 13.578  | 19.326 |
| 0.188             | 0.126 | 0.151  | 0.185   | 0.161  |                    |       | 15.163              | 12.252 | 15.820 | 17.164  | 15.643 |
| 0.199             | 0.153 | 0.178  | 0.184   | 0.238  |                    |       | 19.623              | 11.511 | 14.878 | 15.899  | 16.776 |

**Fig .6C raw data**

| Arg activity/protein |             |             |             |             |             | Normalized to NG |                |                |                |                |                |
|----------------------|-------------|-------------|-------------|-------------|-------------|------------------|----------------|----------------|----------------|----------------|----------------|
|                      | NG          | HG          | 2FE+HG      | 10FE+HG     | ABH+HG      |                  | NG             | HG             | 2FE+HG         | 10FE+HG        | ABH+HG         |
|                      | 0.081       | 0.165       | 0.119       | 0.109       | 0.084       |                  | 93.86%         | 192.44%        | 138.79%        | 127.28%        | 97.68%         |
|                      | 0.083       | 0.148       | 0.110       | 0.106       | 0.094       |                  | 96.81%         | 171.96%        | 127.56%        | 123.73%        | 109.01%        |
|                      | 0.090       | 0.187       | 0.094       | 0.114       | 0.087       |                  | 104.63%        | 217.21%        | 109.08%        | 132.07%        | 101.17%        |
|                      | 0.088       | 0.177       | 0.096       | 0.094       | 0.109       |                  | 102.79%        | 206.03%        | 111.86%        | 109.27%        | 127.23%        |
|                      | 0.079       | 0.176       | 0.106       | 0.097       | 0.080       |                  | 92.24%         | 204.98%        | 123.01%        | 112.39%        | 92.74%         |
|                      | 0.094       | 0.157       | 0.112       | 0.110       | 0.102       |                  | 109.66%        | 183.06%        | 130.54%        | 127.50%        | 118.30%        |
| <b>Mean</b>          | <b>0.09</b> | <b>0.17</b> | <b>0.11</b> | <b>0.10</b> | <b>0.09</b> | <b>Mean</b>      | <b>100.00%</b> | <b>195.95%</b> | <b>123.47%</b> | <b>122.04%</b> | <b>107.69%</b> |

| Protein concentration determination                                 |       |        |         |        |       |                                |  |                            |       |        |         |        |
|---------------------------------------------------------------------|-------|--------|---------|--------|-------|--------------------------------|--|----------------------------|-------|--------|---------|--------|
| Protein concentration OD value—<br>Sample diluted by 12.5 times (1) |       |        |         |        | OD    | Standard concentration (µg/mL) |  | Protein concentration(g/L) |       |        |         |        |
| NG                                                                  | HG    | 2FE+HG | 10FE+HG | ABH+HG | 0.100 | 0                              |  | NG                         | HG    | 2FE+HG | 10FE+HG | ABH+HG |
| 0.439                                                               | 0.428 | 0.415  | 0.433   | 0.446  | 0.114 | 5                              |  | 2.987                      | 2.890 | 2.775  | 2.934   | 3.049  |
| 0.445                                                               | 0.447 | 0.423  | 0.432   | 0.409  | 0.129 | 25                             |  | 3.040                      | 3.058 | 2.846  | 2.925   | 2.722  |
| 0.452                                                               | 0.441 | 0.457  | 0.419   | 0.451  | 0.179 | 50                             |  | 3.102                      | 3.005 | 3.147  | 2.810   | 3.093  |
|                                                                     |       |        |         |        | 0.275 | 125                            |  |                            |       |        |         |        |
|                                                                     |       |        |         |        | 0.455 | 250                            |  |                            |       |        |         |        |
| Protein concentration OD value—<br>Sample diluted by 12.5 times (2) |       |        |         |        | OD    | Standard concentration (µg/mL) |  | Protein concentration(g/L) |       |        |         |        |
| NG                                                                  | HG    | 2FE+HG | 10FE+HG | ABH+HG | 0.090 | 0                              |  | NG                         | HG    | 2FE+HG | 10FE+HG | ABH+HG |
| 0.437                                                               | 0.433 | 0.455  | 0.434   | 0.438  | 0.106 | 5                              |  | 2.954                      | 2.919 | 3.110  | 2.928   | 2.963  |
| 0.444                                                               | 0.459 | 0.429  | 0.427   | 0.445  | 0.130 | 25                             |  | 3.015                      | 3.144 | 2.885  | 2.868   | 3.023  |
| 0.461                                                               | 0.432 | 0.418  | 0.451   | 0.415  | 0.174 | 50                             |  | 3.162                      | 2.911 | 2.790  | 3.075   | 2.764  |
|                                                                     |       |        |         |        | 0.275 | 125                            |  |                            |       |        |         |        |
|                                                                     |       |        |         |        | 0.456 | 250                            |  |                            |       |        |         |        |

| Arg activity determination |       |        |         |        |                      |       |        |         |        |  |
|----------------------------|-------|--------|---------|--------|----------------------|-------|--------|---------|--------|--|
| Arg activity-OD value      |       |        |         |        | Arg activity/protein |       |        |         |        |  |
| NG                         | HG    | 2FE+HG | 10FE+HG | ABH+HG | NG                   | HG    | 2FE+HG | 10FE+HG | ABH+HG |  |
| 0.241                      | 0.478 | 0.331  | 0.321   | 0.256  | 0.081                | 0.165 | 0.119  | 0.109   | 0.084  |  |
| 0.253                      | 0.452 | 0.312  | 0.311   | 0.255  | 0.083                | 0.148 | 0.110  | 0.106   | 0.094  |  |
| 0.279                      | 0.561 | 0.295  | 0.319   | 0.269  | 0.090                | 0.187 | 0.094  | 0.114   | 0.087  |  |
| Arg activity-OD value      |       |        |         |        | Arg activity/protein |       |        |         |        |  |
| NG                         | HG    | 2FE+HG | 10FE+HG | ABH+HG | NG                   | HG    | 2FE+HG | 10FE+HG | ABH+HG |  |
| 0.261                      | 0.517 | 0.299  | 0.275   | 0.324  | 0.088                | 0.177 | 0.096  | 0.094   | 0.109  |  |
| 0.239                      | 0.554 | 0.305  | 0.277   | 0.241  | 0.079                | 0.176 | 0.106  | 0.097   | 0.080  |  |
| 0.298                      | 0.458 | 0.313  | 0.337   | 0.281  | 0.094                | 0.157 | 0.112  | 0.110   | 0.102  |  |

Fig .6D raw data

| Arg1/ $\beta$ -Actin value |      |      |        |         |        | Normalized to NG |         |         |         |         |         |
|----------------------------|------|------|--------|---------|--------|------------------|---------|---------|---------|---------|---------|
|                            | NG   | HG   | 2FE+HG | 10FE+HG | ABH+HG |                  | NG      | HG      | 2FE+HG  | 10FE+HG | ABH+HG  |
|                            | 0.45 | 0.95 | 0.08   | 0.20    | 0.07   |                  | 145.96% | 309.96% | 27.67%  | 63.95%  | 22.46%  |
|                            | 0.25 | 1.05 | 0.52   | 0.13    | 0.11   |                  | 81.04%  | 342.11% | 168.60% | 43.60%  | 36.53%  |
|                            | 0.20 | 0.47 | 0.23   | 0.20    | 0.21   |                  | 66.27%  | 152.88% | 75.29%  | 65.92%  | 69.14%  |
|                            | 0.07 | 0.60 | 0.12   | 0.17    | 0.21   |                  | 24.14%  | 196.76% | 40.38%  | 54.32%  | 68.21%  |
|                            | 0.53 | 1.15 | 0.07   | 0.22    | 0.36   |                  | 172.79% | 373.49% | 22.60%  | 71.68%  | 116.41% |
|                            | 0.34 | 0.78 | 0.14   | 0.30    | 0.62   |                  | 109.80% | 255.42% | 45.13%  | 99.03%  | 203.26% |
| Mean                       | 0.31 | 0.83 | 0.19   | 0.20    | 0.26   | Mean             | 100.00% | 271.77% | 63.28%  | 66.42%  | 86.00%  |

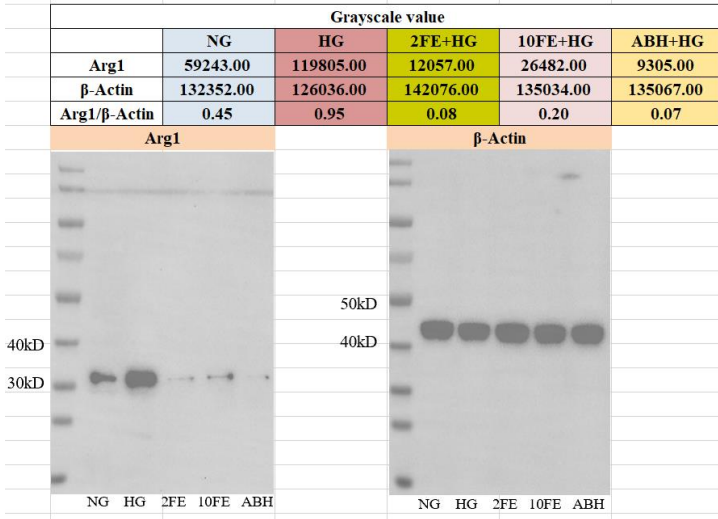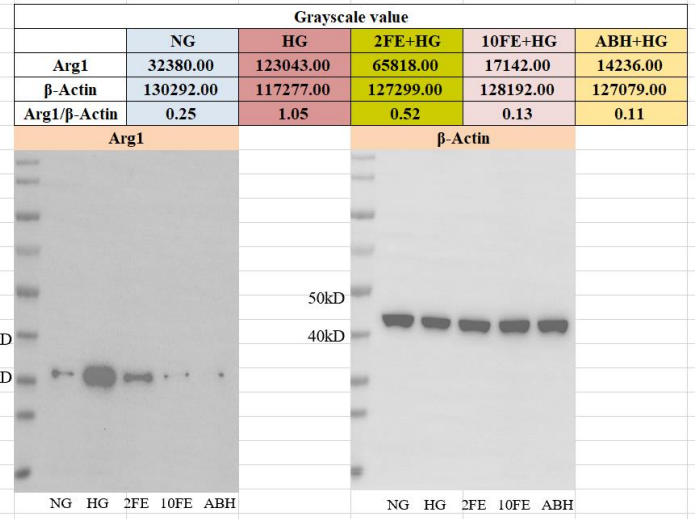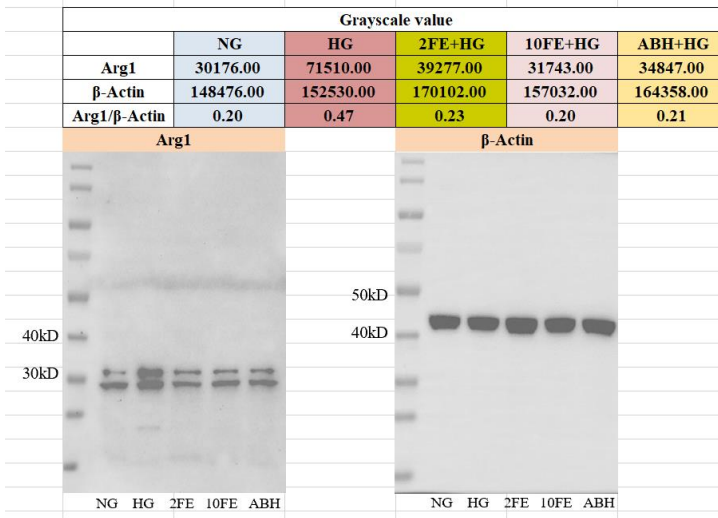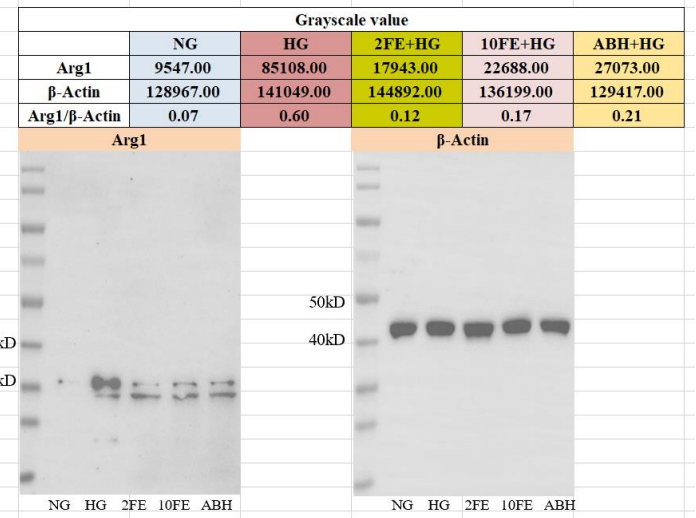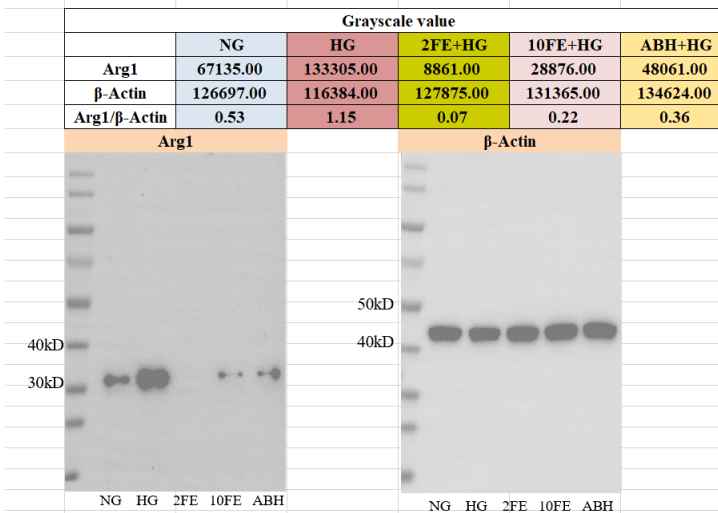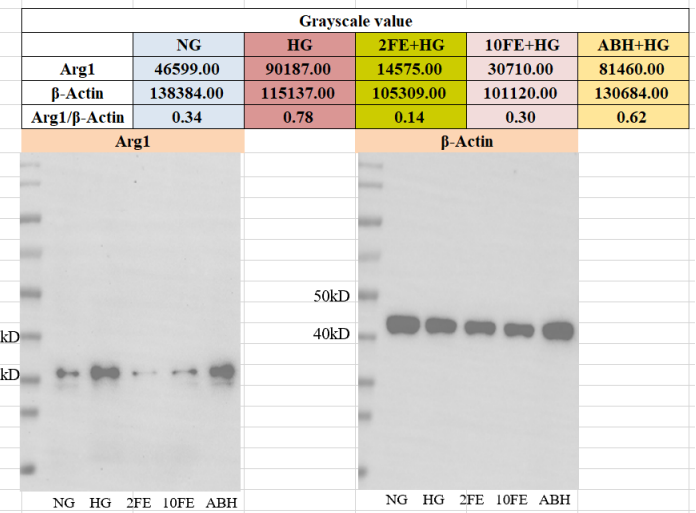



Fig .6E raw data

|             | p-p38/p38 value |             |             |             |             |
|-------------|-----------------|-------------|-------------|-------------|-------------|
|             | NG              | HG          | 2FE+HG      | 10FE+HG     | ABH+HG      |
|             | 0.97            | 1.12        | 0.73        | 0.85        | 0.76        |
|             | 0.51            | 0.96        | 0.87        | 0.94        | 0.90        |
|             | 1.01            | 1.57        | 1.32        | 1.52        | 0.83        |
|             | 1.26            | 1.42        | 1.35        | 1.21        | 0.96        |
|             | 0.80            | 1.55        | 1.35        | 1.29        | 1.42        |
|             | 0.64            | 1.38        | 0.97        | 1.06        | 0.86        |
| <b>Mean</b> | <b>0.87</b>     | <b>1.33</b> | <b>1.10</b> | <b>1.15</b> | <b>0.95</b> |

|             | Normalized to NG |                |                |                |                |
|-------------|------------------|----------------|----------------|----------------|----------------|
|             | NG               | HG             | 2FE+HG         | 10FE+HG        | ABH+HG         |
|             | 111.81%          | 128.90%        | 84.28%         | 98.65%         | 87.85%         |
|             | 58.98%           | 110.69%        | 100.66%        | 108.87%        | 103.68%        |
|             | 116.92%          | 180.72%        | 151.81%        | 175.28%        | 95.50%         |
|             | 145.69%          | 164.02%        | 155.66%        | 139.47%        | 110.90%        |
|             | 92.62%           | 179.20%        | 155.21%        | 149.24%        | 163.44%        |
|             | 73.98%           | 158.73%        | 111.52%        | 122.16%        | 98.84%         |
| <b>Mean</b> | <b>100.00%</b>   | <b>153.71%</b> | <b>126.52%</b> | <b>132.28%</b> | <b>110.04%</b> |

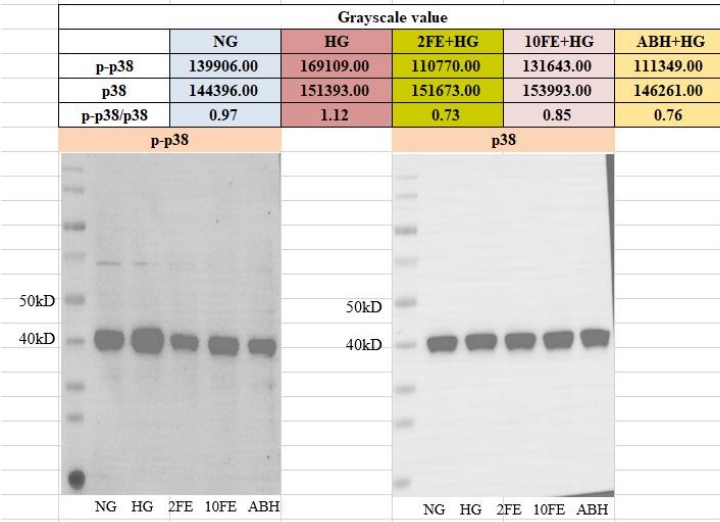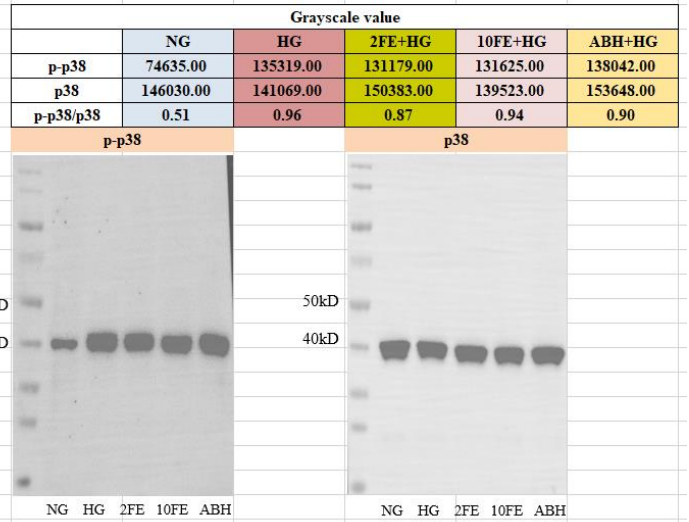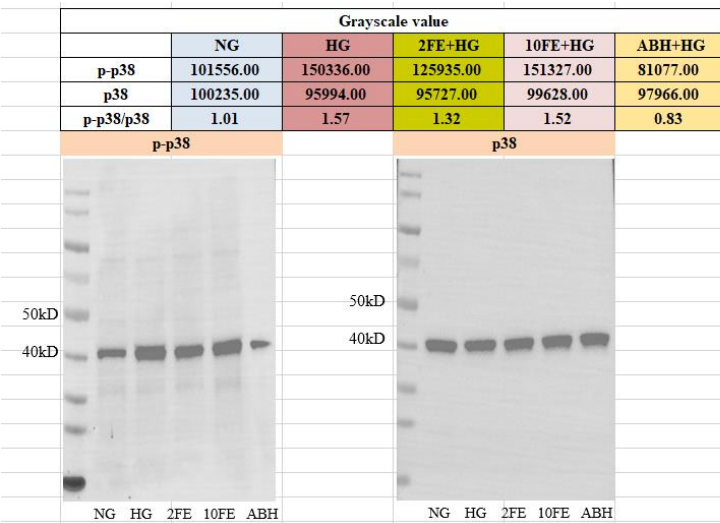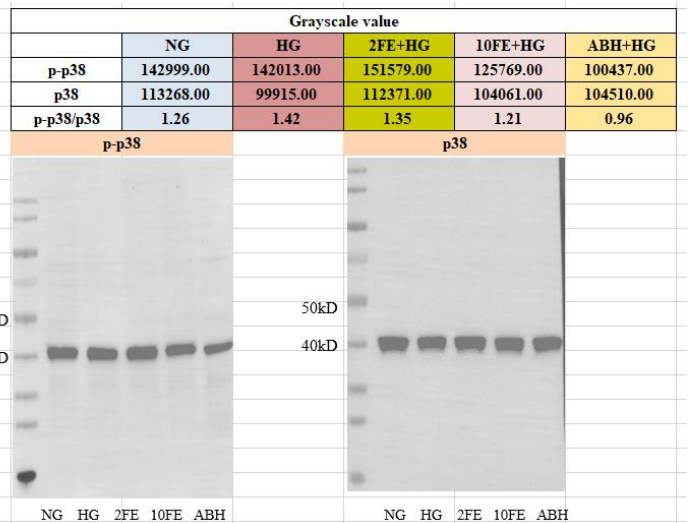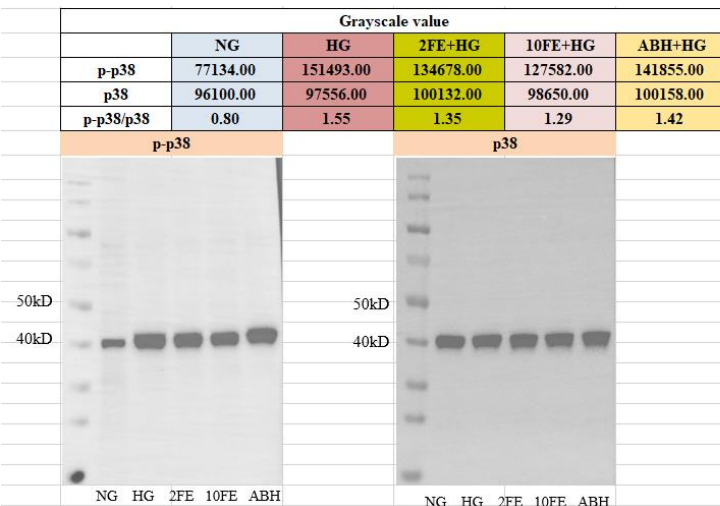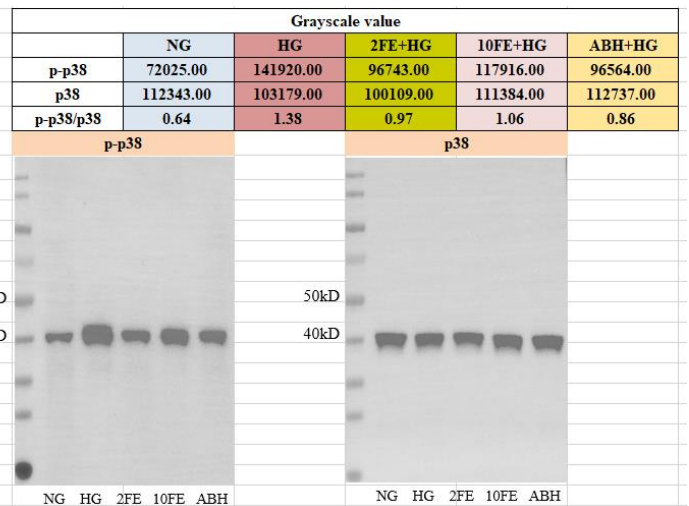



**Fig .6F raw data**

| eNOS/ $\beta$ -Actin |             |             |             |             |             | Normalized to NG |                |               |               |               |                |
|----------------------|-------------|-------------|-------------|-------------|-------------|------------------|----------------|---------------|---------------|---------------|----------------|
|                      | NG          | HG          | 2FE+HG      | 10FE+HG     | ABH+HG      |                  | NG             | HG            | 2FE+HG        | 10FE+HG       | ABH+HG         |
|                      | 1.17        | 0.18        | 0.27        | 0.51        | 0.39        |                  | 156.56%        | 24.81%        | 36.12%        | 68.13%        | 52.37%         |
|                      | 0.61        | 0.22        | 0.27        | 0.50        | 0.90        |                  | 82.17%         | 30.02%        | 36.57%        | 67.60%        | 120.18%        |
|                      | 1.22        | 0.48        | 0.61        | 0.79        | 1.08        |                  | 164.08%        | 64.08%        | 81.85%        | 106.60%       | 144.92%        |
|                      | 0.55        | 0.15        | 0.39        | 0.55        | 0.71        |                  | 74.06%         | 20.06%        | 52.00%        | 73.49%        | 95.82%         |
|                      | 0.48        | 0.42        | 0.85        | 0.62        | 0.96        |                  | 64.69%         | 55.92%        | 114.52%       | 83.59%        | 129.47%        |
|                      | 0.44        | 0.19        | 0.65        | 0.54        | 0.54        |                  | 58.43%         | 26.18%        | 87.44%        | 71.95%        | 72.26%         |
| <b>Mean</b>          | <b>0.74</b> | <b>0.27</b> | <b>0.51</b> | <b>0.59</b> | <b>0.76</b> | <b>Mean</b>      | <b>100.00%</b> | <b>36.84%</b> | <b>68.08%</b> | <b>78.56%</b> | <b>102.50%</b> |

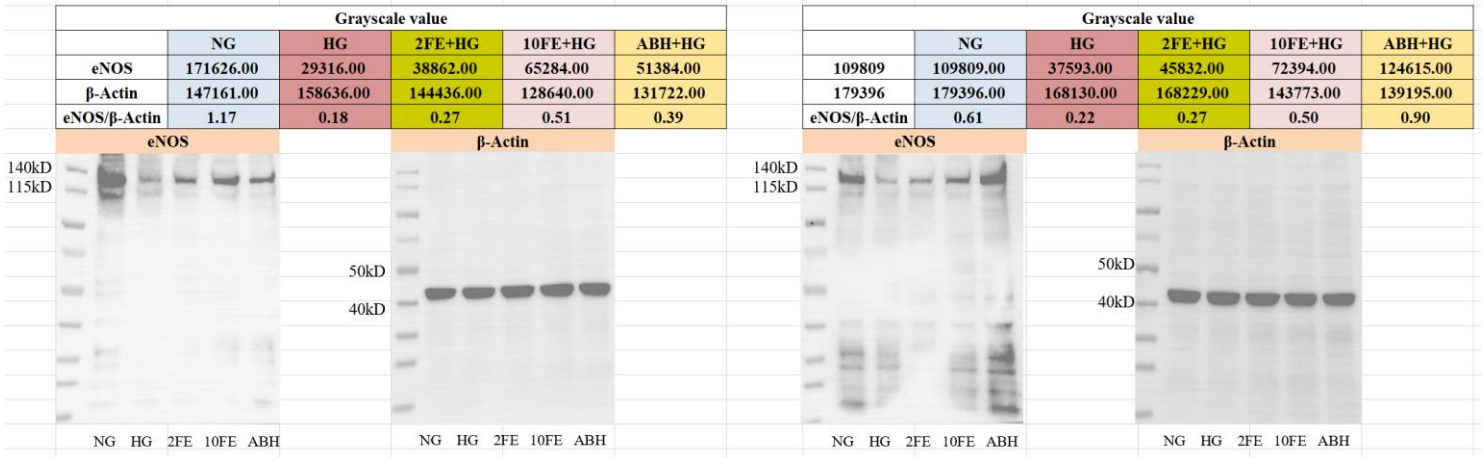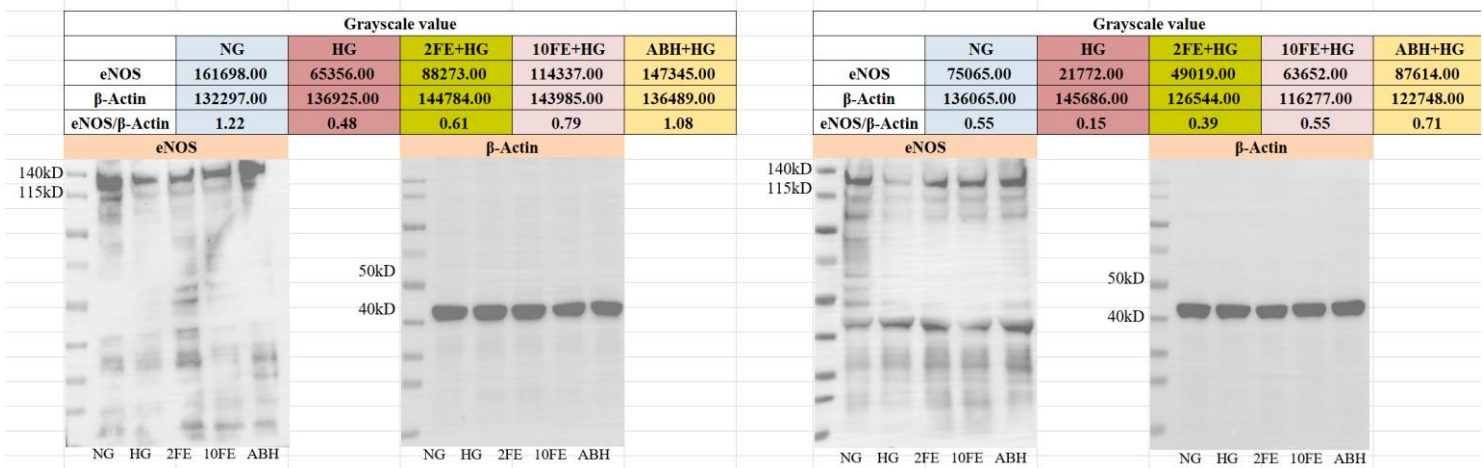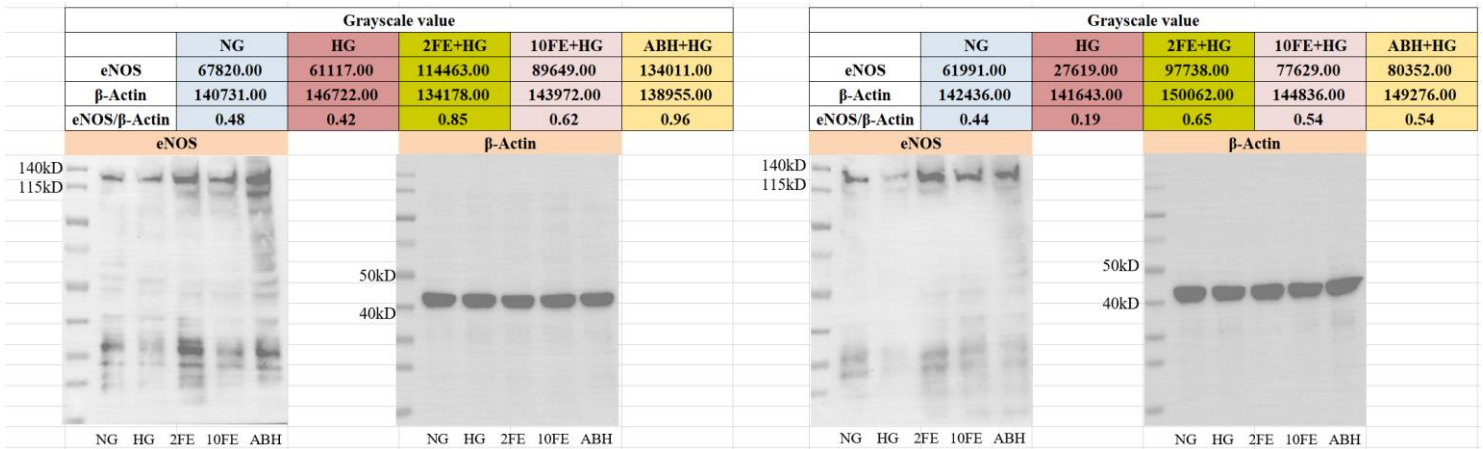



**Fig .S1A raw data**

| Argl/ $\beta$ -Actin value |             |             |             |
|----------------------------|-------------|-------------|-------------|
|                            | 5.5mM       | 30mM        | 50mM        |
|                            | 0.20        | 0.76        | 0.87        |
|                            | 0.62        | 1.19        | 1.21        |
|                            | 0.59        | 1.66        | 1.73        |
|                            | 0.50        | 1.71        | 1.75        |
| <b>Mean</b>                | <b>0.48</b> | <b>1.33</b> | <b>1.39</b> |

| Normalized to NG |                |                |                |
|------------------|----------------|----------------|----------------|
|                  | 5.5mM          | 30mM           | 50mM           |
|                  | 41.88%         | 159.16%        | 182.20%        |
|                  | 129.84%        | 249.21%        | 253.40%        |
|                  | 123.56%        | 347.64%        | 362.30%        |
|                  | 104.71%        | 358.12%        | 366.49%        |
| <b>Mean</b>      | <b>100.00%</b> | <b>278.53%</b> | <b>291.10%</b> |

| Grayscale value                      |                  |                  |                  |
|--------------------------------------|------------------|------------------|------------------|
|                                      | 5.5mM            | 30mM             | 50mM             |
| <b>Argl</b>                          | <b>35122.00</b>  | <b>147008.00</b> | <b>151981.00</b> |
| <b><math>\beta</math>-Actin</b>      | <b>178944.00</b> | <b>192538.00</b> | <b>175606.00</b> |
| <b>Argl/<math>\beta</math>-Actin</b> | <b>0.20</b>      | <b>0.76</b>      | <b>0.87</b>      |

| Grayscale value                      |                  |                  |                  |
|--------------------------------------|------------------|------------------|------------------|
|                                      | 5.5mM            | 30mM             | 50mM             |
| <b>Argl</b>                          | <b>135344.00</b> | <b>270073.00</b> | <b>225019.00</b> |
| <b><math>\beta</math>-Actin</b>      | <b>218443.00</b> | <b>227084.00</b> | <b>185956.00</b> |
| <b>Argl/<math>\beta</math>-Actin</b> | <b>0.62</b>      | <b>1.19</b>      | <b>1.21</b>      |

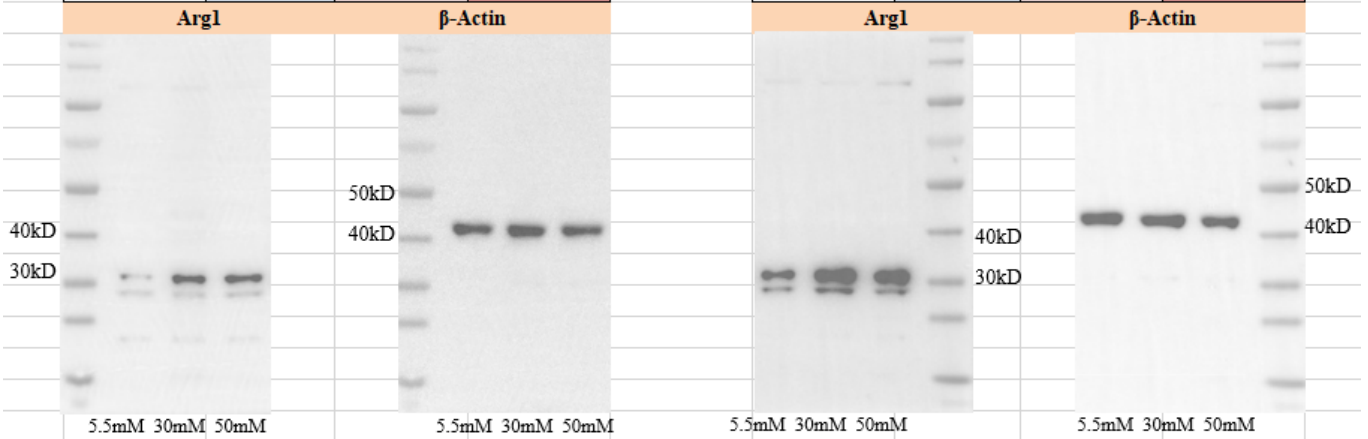

| Grayscale value                      |                  |                  |                  |                  |                  |                  |
|--------------------------------------|------------------|------------------|------------------|------------------|------------------|------------------|
|                                      | 5.5mM            | 5.5mM            | 30mM             | 30mM             | 50mM             | 50mM             |
| <b>Argl</b>                          | <b>74806.00</b>  | <b>50228.00</b>  | <b>175540.00</b> | <b>152702.00</b> | <b>170391.00</b> | <b>141805.00</b> |
| <b><math>\beta</math>-Actin</b>      | <b>125924.00</b> | <b>100638.00</b> | <b>105889.00</b> | <b>89118.00</b>  | <b>98666.00</b>  | <b>80905.00</b>  |
| <b>Argl/<math>\beta</math>-Actin</b> | <b>0.59</b>      | <b>0.50</b>      | <b>1.66</b>      | <b>1.71</b>      | <b>1.73</b>      | <b>1.75</b>      |

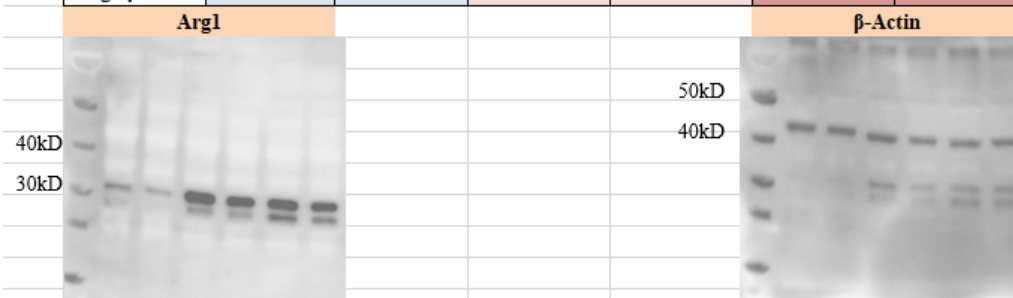

**Fig .S1B raw data**

| Arg activity/protein |             |             | Normalized to NG |                |                |
|----------------------|-------------|-------------|------------------|----------------|----------------|
| 5.5mM                | 30mM        | 50mM        | 5.5mM            | 30mM           | 50mM           |
| 0.082                | 0.175       | 0.171       | 96.17%           | 206.57%        | 201.34%        |
| 0.093                | 0.140       | 0.197       | 109.56%          | 165.15%        | 231.51%        |
| 0.088                | 0.225       | 0.194       | 103.14%          | 265.10%        | 228.05%        |
| 0.085                | 0.126       | 0.178       | 100.16%          | 148.71%        | 209.56%        |
| 0.08                 | 0.17        | 0.182       | 90.96%           | 202.64%        | 214.54%        |
| <b>Mean</b>          | <b>0.08</b> | <b>0.17</b> | <b>100.00%</b>   | <b>197.63%</b> | <b>217.00%</b> |

**Protein concentration determination**

| Protein concentration OD value—<br>Sample diluted by 12.5 times |       |       | OD    | Standard concentration (µg/mL) | 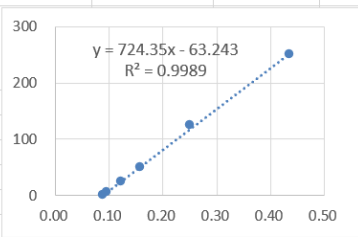 | Protein concentration(g/L) |       |       |
|-----------------------------------------------------------------|-------|-------|-------|--------------------------------|------------------------------------------------------------------------------------|----------------------------|-------|-------|
| 5.5mM                                                           | 30mM  | 50mM  |       |                                |                                                                                    | 5.5mM                      | 30mM  | 50mM  |
| 0.432                                                           | 0.509 | 0.546 | 0.088 | 0                              |                                                                                    | 2.925                      | 3.607 | 3.935 |
| 0.553                                                           | 0.422 | 0.530 | 0.096 | 5                              |                                                                                    | 3.997                      | 2.837 | 3.793 |
| 0.545                                                           | 0.401 | 0.417 | 0.122 | 25                             |                                                                                    | 3.926                      | 2.651 | 2.792 |
| 0.533                                                           | 0.461 | 0.448 | 0.159 | 50                             |                                                                                    | 3.819                      | 3.182 | 3.067 |
| 0.486                                                           | 0.469 | 0.479 | 0.251 | 125                            |                                                                                    | 3.403                      | 3.253 | 3.341 |
|                                                                 |       |       | 0.436 | 250                            |                                                                                    |                            |       |       |

**Arg activity determination**

| Arg activity-OD value |       |       | Arg activity/protein |       |       |
|-----------------------|-------|-------|----------------------|-------|-------|
| 5.5mM                 | 30mM  | 50mM  | 5.5mM                | 30mM  | 50mM  |
| 0.239                 | 0.633 | 0.673 | 0.082                | 0.175 | 0.171 |
| 0.372                 | 0.398 | 0.746 | 0.093                | 0.140 | 0.197 |
| 0.344                 | 0.597 | 0.541 | 0.088                | 0.225 | 0.194 |
| 0.325                 | 0.402 | 0.546 | 0.085                | 0.126 | 0.178 |
| 0.263                 | 0.560 | 0.609 | 0.077                | 0.172 | 0.182 |
