# Supplementary material for: Fenugreek extract improves diabetes-induced endothelial dysfunctionviathe arginase 1 pathway
Source: Royal Society of Chemistry journal article supplement (doi:10.1039/d3fo04283a), 2024-01-01
Supplement: d3fo04283a2.pdf [file d3fo04283a2.pdf]

## Supplementary data

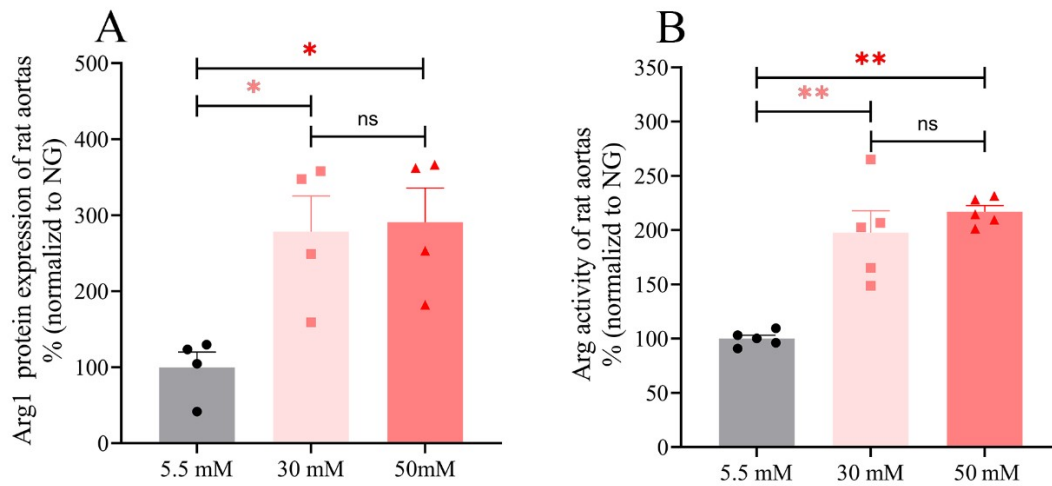

Fig. S1 The comparison between the glucose concentrations of 30 mM and 50 mM to induce the rat aortas.

(A) Arg1 protein expressions of rat aortas ( $n = 4$ ). (B) Arg activity of rat aortas ( $n = 5$ ).

Data are represented as mean  $\pm$  SEM. 5.5 mM: 5.5 mM glucose; 30 mM: 30 mM glucose; 50 mM: 50 mM glucose. \* $P < 0.05$  and \*\* $P < 0.01$  vs. 5.5 mM.
